17 **Abstract**

18 LINE-1 (L1) are autonomous retroelements that have retained their ability to mobilize.  
19 Mechanisms regulating L1 mobility include DNA methylation in somatic cells and the  
20 Piwi-interacting RNA pathway in the germline. During pre-implantation stages of  
21 mouse embryonic development, however, both pathways are inactivated leading to a  
22 critical window necessitating alternate means of L1 regulation. We previously reported  
23 an increase in L1 levels in *Dicer\_KO* mouse embryonic stem cells (mESCs).  
24 Intriguingly this was accompanied by only a marginal increase in retrotransposition,  
25 suggestive of additional mechanisms suppressing L1 mobility. Here, we demonstrate  
26 that L1 Ribonucleoprotein complexes (L1 RNP) accumulate as aggregates in  
27 *Dicer\_KO* cytoplasm along with the RNA helicase MOV10. The combined  
28 overexpression of L1 RNAs and MOV10 is sufficient to create L1 RNP aggregates in  
29 stem cells. In *Dicer\_KO* mESCs, MOV10 is upregulated due to the loss of its direct  
30 regulation by miRNAs. The newly discovered post-transcriptional regulation of *Mov10*  
31 expression, and its role in preventing L1 retrotransposition by driving novel cytosolic  
32 aggregation affords alternate routes to explore for therapy and disease progression.

## 33 **Introduction**

34 Approximately 17-20% of human and mouse genomes are composed of Long  
35 Interspersed Nucleotide Elements 1 (LINE-1 or L1) <sup>1,2</sup>. These elements, ranging from  
36 6 to 7 kb in length, encode enzymatic activities necessary for retrotransposition. In  
37 mouse, L1s are composed of a 5' untranslated region (UTR) harboring an RNA  
38 Polymerase II (Pol II) promoter encoding a bicistronic transcript. The two open reading  
39 frames (ORF) encode for L1 ORF1 protein that is speculated to function as an RNA  
40 chaperone and L1 ORF2 protein that has endonuclease and reverse transcriptase  
41 activities. The transcript harbors a 3'UTR and a poly adenylation (poly(A)) signal. Only  
42 a full-length poly(A) transcript is capable of transposing. Upon export from the nucleus,  
43 L1 RNA is translated in the cytoplasm. L1 RNA, ORF1 and ORF2 proteins associate  
44 to form ribonucleoprotein particles (L1 RNPs), which are imported back together into  
45 the nucleus. Once in the nucleus, the L1 RNA is reverse transcribed and integrated  
46 into a new genomic location by a coupled reverse transcription. During this  
47 mobilization mechanism, the retrotransposon sequence is prone to truncations and  
48 inversions, resulting in the insertion of mutated copies unable to jump a second time  
49 <sup>3,4</sup>. Nevertheless, 100 <sup>5</sup> and 3000 <sup>6</sup> full length L1 elements in human and mouse  
50 genomes, respectively, retain the ability to encode the machinery necessary for  
51 production of the RNA intermediate, its reverse transcription, and consequent  
52 integration into a new genomic location. In mouse, active L1s are divided into three  
53 subfamilies: Tf, Gf and A, which are defined by the variable sequence and numbers of  
54 monomers (tandem repeat units of 200 bp) contained in their 5'UTR <sup>7-9</sup>.

55 While transposable elements are indispensable for genome variation and evolution,  
56 rogue and/or rampant transposition leads to disease <sup>3</sup>. Elucidating mechanisms that  
57 regulate L1 transcription and mobility have been an active area of research since their  
58 discovery. DNA methylation in somatic cells and Piwi-interacting RNA (piRNA)  
59 pathway in the germline are well established regulators of L1 retrotransposition <sup>10-12</sup>.  
60 At the blastocyst stage of embryonic development however, both the above mentioned  
61 pathways are inactivated leading to a window necessitating alternate mechanisms of  
62 L1 regulation. The microRNA (miRNA) effector protein DICER has been implicated in  
63 modulating expression of L1 during this stage of development <sup>13</sup>. MicroRNAs are 21-  
64 24 nucleotide (nt) long Pol II transcripts that play a major role in fine-tuning gene  
65 expression post-transcriptionally <sup>14,15</sup>. Briefly, miRNAs are transcribed as primary (pri)  
66 miRNAs and processed into precursor (pre) miRNAs by DGCR8/DROSHA

67 microprocessor complex in the nucleus. Upon export into the cytoplasm DICER  
68 cleaves pre-miRNAs to give rise to mature miRNAs. The mature miRNA duplex is  
69 loaded onto ARGONAUTE (AGO) proteins, upon unwinding of the duplex, one of the  
70 two strands is degraded. Along with accessory proteins, AGO loaded with the guide  
71 miRNA strand forms the RNA-induced silencing complex (RISC) and acts as the  
72 effector. Base pairing of miRNA at its seed sequence with complementary miRNA  
73 response elements (MREs), typically found in the 3'UTR sequence of mRNAs induces  
74 translational repression or mRNA degradation. Pre-implantation mouse embryos  
75 deleted for *Dicer* present an upregulation of L1 elements <sup>16,17</sup>. In human cancer cells,  
76 miR-128 was shown to regulate L1 transposition via two mechanisms. Firstly, miR-  
77 128 repressed L1 expression directly by binding to a noncanonical binding site in L1  
78 ORF2 RNA <sup>18</sup> and secondly, miR-128 bound to a canonical binding site in the 3'UTR  
79 sequence of *Tnpo1* an import factor that regulates entry of L1 RNP complex into the  
80 nucleus post translation <sup>19</sup>. This mode of regulation via miR-128 however does not  
81 appear to be conserved in mESCs <sup>20</sup>. Recently, the direct binding of miRNA let-7 to  
82 L1 mRNA was shown to impair L1 ORF2 translation and consequently  
83 retrotransposition <sup>21</sup>. Since processing of pri-let7 miRNA to mature let-7 miRNA is  
84 blocked in mESCs <sup>22</sup>, this mechanism of fine-tuning L1 expression is also not  
85 conserved in mESCs. To delve deeper into the role of *Dicer* in regulating L1 during  
86 embryonic development our laboratory utilized mouse embryonic stem cells (mESCs)  
87 as a model. In *Dicer*\_Knockout (KO) mESCs, while a 6-8 fold increase in L1  
88 transcription was observed, a concomitant increase in the rate of retrotransposition  
89 was not uncovered <sup>13</sup>. In this study, we demonstrate that miRNAs are involved in the  
90 regulation of L1 retrotransposition in mESCs through the direct regulation of the RNA  
91 helicase MOV10. Upon loss of miRNAs, MOV10 is strongly upregulated and  
92 accumulates in the cytoplasm of mESCs, driving sequestration of L1 RNPs into novel  
93 aggregates, thereby preventing L1 mobility.

94

## 95 **Results**

96 In order to better understand why the strong upregulation of L1 RNAs does not lead  
97 to a subsequent retrotransposition in *Dicer*\_KO mESCs <sup>13</sup>, we looked at the  
98 localization of L1 RNA and protein in Wild type (WT) and mutant cells. We probed for  
99 L1 RNA derived from the Tf L1 family by RNA Fluorescent in Situ Hybridization (RNA  
100 FISH) along with L1 ORF1 protein by indirect immunofluorescence (IF). While in WT

101 mESCs, we observed diffused signal for both L1 Tf RNA and ORF1 protein, they co-  
102 localized as L1 ribonucleoprotein (L1 RNP) foci in cytoplasm of the two independent  
103 *Dicer\_KO* clones (Fig.1A). The median number of L1 RNP foci in the cytoplasm per  
104 cell in *Dicer\_KO1* and *Dicer\_KO2* mESCs was 9 and 7 respectively as compared to 0  
105 in WT cells. Additionally, in 30-35% of *Dicer\_KO* clones, L1 RNP were observed to co-  
106 localize in larger foci (Fig.1A). These observations led us to hypothesize that  
107 sequestration of L1 RNP in the cytoplasm of *Dicer\_KO* mESCs is preventing L1  
108 retrotransposition.

109 To characterize L1 RNP foci we aimed to identify other cellular components that might  
110 share their location with them. We therefore tested if known interactors of human L1  
111 proteins might colocalize with L1 RNP cytoplasmic foci in *Dicer\_KO* mESCs<sup>23-26</sup>.  
112 Amongst the list of candidates interacting with both L1 ORF1 and L1 ORF2<sup>26</sup>, we  
113 looked at RNA helicases UPF1 and MOV10 by IF. While UPF1 was observed to have  
114 diffused cytoplasmic staining (data not shown), MOV10 co-localized with L1 RNP in  
115 the cytoplasm of *Dicer\_KO* mESCs (Fig. 1B). Further analysis revealed MOV10 to co-  
116 localize with L1 ORF1 protein in *Dicer\_KO* cells with a median of 3 foci in WT cells  
117 and 12 and 15 respectively in *Dicer\_KO1* and *Dicer\_KO2* mESCs. Percentage of cells  
118 with large ORF1-MOV10 foci was 26-47% in the two *Dicer\_KO* lines (Fig. 1B). The  
119 higher frequency of ORF1-MOV10 foci as compared to Tf-ORF1 foci in *Dicer\_KO* cells  
120 is most likely due to the lower sensitivity for detecting Tf RNA by RNA FISH. Since  
121 MOV10 co-localization with L1 ORF1 foci in *Dicer\_KO* mESCs was high and due to  
122 the absence of good antibodies available for L1 proteins raised in hosts other than  
123 rabbit for co-staining IF experiments, we further used MOV10 as a proxy for L1 RNP  
124 localization.

125 Localization of L1 RNP as cytoplasmic foci was previously reported for human L1  
126 proteins upon their ectopic overexpression in HEK293T cells<sup>27</sup>. L1 ORF1 foci were  
127 furthermore shown to co-localize with stress granules and RNA-binding proteins  
128 including components of the RISC complex<sup>27</sup>. To assess the nature of the observed  
129 mouse L1 RNP foci, we co-stained WT and *Dicer\_KO* mESCs for G3BP1, a marker  
130 for stress granules<sup>28</sup>, along with MOV10. The signal for G3BP1 was mainly diffused  
131 cytoplasmic in both WT and *Dicer\_KO* mESCs, indicating that unlike human cancer  
132 cells, mouse L1 ORF1-MOV10 foci are not stress granules (Fig. 2A). However,  
133 treatment with 0.5mM Sodium Arsenite for 20 minutes to induce stress caused MOV10  
134 to co-localize with G3BP1 as cytoplasmic bodies in *Dicer\_KO* cells (Fig. 2A). These

135 data led us to hypothesize that L1 RNP foci in *Dicer*\_KO mESCs might be poised but  
136 are not as yet mature stress granules.

137 Partitioning of stress granule proteins as liquid-liquid phase separation (LLPS) is  
138 emerging as a main driver for shifting dynamics from being near soluble to condensate  
139 formation thereby impacting their biological function<sup>29</sup>. RNA and RNA binding proteins  
140 (RBPs) are key components of these cytoplasmic condensates<sup>30</sup>. Recently, by  
141 microscopy and NMR spectroscopy, human L1 ORF1 protein was shown to form liquid  
142 droplets *in vitro* in a salt dependent manner<sup>31</sup>. To test whether L1 ORF1 foci in mESCs  
143 undergo similar LLPS, we treated *Dicer*\_KO mESCs with 3% 1,6 Hexanediol for 15  
144 minutes, a concentration at which proteins undergoing LLPS have been previously  
145 observed to change solubility from being in foci to becoming diffused in mESCs<sup>32</sup>. No  
146 overt change in L1 ORF1-MOV10 foci was observed in cells treated with 1,6  
147 Hexanediol (Extended Data Fig.1A), suggesting that L1 ORF1-MOV10 foci are not  
148 LLPS condensates.

149 Human L1 ORF1 protein are also known to associate with Processing Body (P-body)  
150 enriched mRNAs<sup>33</sup>. While elucidation of the functional relevance of P-Bodies is an  
151 active area of research, it is well established that these cytoplasmic granules also  
152 undergo LLPS<sup>34</sup>. Since the L1 RNP foci are not sensitive to 1,6 Hexanediol treatment  
153 and most likely not undergoing LLPS, our data argues against L1 RNP foci being  
154 components of P-body in mutant mESCs. Additionally, the protein ARGONAUTE2  
155 (AGO2), a known component of P-bodies<sup>35</sup> and an effector of the miRNA biogenesis  
156 pathway, is required for P-body formation<sup>36,37</sup>. In *Dicer*\_KO mESCs due to the  
157 absence of miRNAs, AGO2 protein levels are reduced and the protein destabilized<sup>13</sup>  
158 (Fig. 2B). However protein levels of DDX6, another known constituent of P-bodies<sup>38</sup>,  
159 were unchanged as compared to WT cells (Fig. 2B). We therefore looked at the cellular  
160 localization of DDX6 to assess P-body integrity and association with L1 RNP foci.  
161 Unlike WT cells where DDX6 formed droplet like foci characteristic of P-bodies in the  
162 cytoplasm, in *Dicer*\_KO cells, DDX6 was more diffusely localized in the cytoplasm. In  
163 26-32% of *Dicer*\_KO mESCs, multiple small DDX6 foci were observed co-localizing  
164 with larger L1 Tf RNA foci (Fig. 2B). The partial co-localization with DDX6 in cells with  
165 low AGO2 levels suggest that L1 RNP foci are not canonical P-bodies, corroborating  
166 earlier studies enumerating the requirement of intact miRNA biogenesis in P-body  
167 fidelity<sup>36,37</sup>.

168 Finally, we ascertained that L1 RNP foci were not autophagosomes<sup>39</sup> as LC3B a  
169 marker for autophagosomes did not co-localize with MOV10 in mESCs by IF  
170 (Extended Data Fig. 1B). We therefore called L1 RNP present in cytoplasmic foci of  
171 *Dicer*\_KO mESCs, aggregates as they contain an assembly of RNA and proteins  
172 without undergoing phase separation.

173 L1 upregulation is amongst the many changes in gene expression observed upon  
174 deleting *Dicer* in mESCs<sup>13</sup>. To parse out whether as observed in human cultured cells  
175 overexpression of L1s was sufficient for cytoplasmic sequestration<sup>23,27</sup>, we  
176 engineered WT mESCs to endogenously upregulate L1 using CRISPRa (L1<sup>UP</sup>) (Fig.  
177 3A, Extended Data Fig. 2A). We designed single guide RNAs (sgRNAs) to target  
178 dCas9 fused with VP160 to the 5'UTR sequence of the L1 Tf family (Extended Data  
179 Fig. 2B). For the generation of independent clones (CI), L1<sup>UP</sup> CI1 cells were transfected  
180 with one sgRNA, while two sgRNA pairs were used to upregulate L1 in L1<sup>UP</sup> CI2. A  
181 2.5-fold increase in L1 Tf transcript levels as compared to the control cell line (Ctrl)  
182 transfected with an empty sgRNA vector was observed (Extended Data Fig. 2C) in  
183 L1<sup>UP</sup> clones. Given the sequence homology of the three L1 families, we also observed  
184 a 3-fold increase in transcript levels of L1 A family, while the increased expression of  
185 L1 Gf family was found to be statistically significant for only CI1 (Extended Data Fig.  
186 2C). While L1 transcript levels in L1<sup>UP</sup> cells was lower than in *Dicer*\_KO (Extended  
187 Data Fig. 2C), expression of L1 ORF1 protein in L1<sup>UP</sup> was similar to that observed in  
188 *Dicer*\_KO cells (Fig 3A).

189 To assess if L1 elements upregulated with CRISPRa were competent for  
190 retrotransposition, we primarily performed Northern Blot analysis and observed that  
191 like in *Dicer*\_KO mESCs, full length L1 transcripts were being overexpressed<sup>13</sup>  
192 (Extended Data Fig. 2D). Importantly, this level of upregulation of L1 RNA was not  
193 sufficient to cause L1 RNP accumulation in cytoplasmic aggregates in L1<sup>UP</sup> mESCs  
194 (Fig. 3B). Using a plasmid based retrotransposition assay<sup>40</sup>, we tested if in the  
195 absence of L1 RNP cytosolic sequestration there was an enhanced rate of L1  
196 retrotransposition in the engineered L1<sup>UP</sup> mESCs. We transfected Ctrl, L1<sup>UP</sup> CI1 and  
197 L1<sup>UP</sup> CI2 with either wild type JJ-L1SM (L1WT) or a plasmid with mutation in ORF2  
198 rendering it incompetent for jumping (L1N21A) that carried *Blasticidin* resistance  
199 (BlastR) as a reporter gene and *Hygromycin* (HygR) as a selection marker<sup>41</sup>. Unlike  
200 in *Dicer*\_KO cells<sup>13</sup>, L1 upregulation was accompanied by an increase in the rate of  
201 mobility depicted by the higher number of BlastR colonies observed in L1<sup>UP</sup> CI1 and

202 CI2 as compared to Ctrl mESCs (Fig. 3C). BlastR colonies observed in the two L1<sup>UP</sup>  
203 cell lines transfected with L1N21A reporter confirm previous observation of  
204 mobilization of mutant L1s aided by endogenous full length L1s in the cell, but at  
205 relatively low frequencies <sup>42</sup>. To conclude, forced endogenous upregulation of L1  
206 active elements in WT mESCs is not sufficient to create L1 RNP cytoplasmic  
207 aggregates and leads to an increase in retrotransposition.

208 Given that upregulation of L1 in mESCs was not sufficient to induce L1 RNP  
209 aggregation in the cytoplasm (Fig. 3B), and our finding that MOV10 co-localized with  
210 L1 RNP in *Dicer\_KO* cells (Fig. 1B), we speculated that cytosolic aggregation of L1  
211 RNP might be driven by the upregulation of MOV10 observed in *Dicer\_KO* mESCs at  
212 RNA and protein levels (Extended Data Fig. 2E, 3A). MOV10 upregulation in *Dicer\_KO*  
213 mESCs was confirmed by RTqPCR analysis (Extended Data Fig. 2F). In addition, no  
214 changes in MOV10 expression were observed either at RNA (Extended Data Fig.2F)  
215 or protein levels in L1<sup>UP</sup> mESCs (Fig. 3A). We therefore ruled out L1 overexpression  
216 as the driver for MOV10 upregulation and investigated the role of miRNAs in post-  
217 transcriptional regulation of *Mov10* as miRNA biogenesis is impaired in *Dicer\_KO*  
218 mESCs.

219 Using TargetScan software <sup>43</sup>, we identified multiple miRNAs (miR-138-5p, miR-30-  
220 5p, miR-16-5p and miR-153-5p) as predicted to target the 3'UTR sequence of *Mov10*  
221 (Fig. 4A). The relative expression of each miRNA in WT cells was determined using  
222 previously published small RNA sequencing data from our laboratory <sup>44</sup> (Extended  
223 Data Fig. 3A). MiR-16-5p and miR-30-5p are highly expressed in WT mESCs  
224 compared to the intermediate expression of miR-138-5p, and the low expression of  
225 miR-153-3p (Extended Data Fig. 3A). We tested whether the predicted miRNAs might  
226 directly regulate *Mov10* expression by performing a luciferase reporter assay <sup>45</sup>. We  
227 subcloned the 3'UTR sequence of *Mov10* downstream of the *Renilla luciferase*  
228 reporter gene in a plasmid that also encoded *Firefly luciferase* as a normalizer.  
229 Transient transfection of this plasmid along with the respective miRNAs into HEK293T  
230 followed by measurement of the respective luminescence showed that for the tested  
231 mimics, RENILLA expression was significantly sensitive to transfection with miR-16-  
232 5p and miR-153-3p (Fig. 4B). To corroborate that the upregulation of MOV10 in *Dicer\_*  
233 *KO* cells is indeed mediated by miRNAs and is not a consequence of noncanonical  
234 function of *Dicer*, we tested whether a similar upregulation of MOV10 is present in  
235 *Drosha\_KO* cells where the canonical miRNA biogenesis pathway is also impaired <sup>46</sup>.



236 Western blot (WB) analysis on *Drosha\_KO* cells revealed that MOV10 is indeed  
237 upregulated in these cells (Extended Data Fig. 3B). Finally, to confirm miRNA  
238 mediated regulation of *Mov10* expression, we transiently transfected *Drosha\_KO*  
239 mESCs with the respective miRNA mimics either singly or in pairs and measured  
240 MOV10 expression. Unlike previously observed with the luciferase assay, expression  
241 of MOV10 was downregulated upon transfection with each of the four tested miRNA  
242 mimics (Fig. 4C). Interestingly, only paired transfection of miR-16-5p with miR-138-5p  
243 or miR-153-3p acted synergistically to reduce MOV10 protein levels down to WT levels  
244 (Fig. 4C). Collectively, these data reveal a role for miRNAs in fine-tuning MOV10  
245 expression in mESCs, explaining the observed MOV10 upregulation in *Dicer\_KO* and  
246 *Drosha\_KO* mESCs (Fig. 3A, Extended Data Fig. 3B).

247 Given the upregulation of MOV10 and L1 ORF1 in *Drosha\_KO* cells as compared to  
248 WT (Extended Data Fig. 3B), we next assessed if L1 RNP correspondingly also  
249 aggregate in the cytoplasm of these miRNA mutants. We performed IF with L1 ORF1  
250 and MOV10 antibodies in two independent *Drosha\_KO* clones and observed MOV10  
251 co-localizing with L1 RNP in the cytoplasm of *Drosha\_KO* mESCs (Extended Data Fig.  
252 3C). The median ORF1-MOV10 aggregates per cell were 21 and 12 in *Drosha\_KO1*  
253 and *Drosha\_KO2* mESCs respectively (Extended Data Fig. 3C). Percentage of cells  
254 with large ORF1-MOV10 foci was 31-44% in the two *Drosha\_KO* lines (Extended Data  
255 Fig. 3C), similar to that observed in *Dicer\_KO* cells (Fig. 1B).

256 To confirm our hypothesis that aggregation of L1 RNP driven by MOV10  
257 overexpression was preventing L1 retrotransposition, we examined whether restoring  
258 MOV10 expression in *Drosha\_KO* cells would allow L1 mobilization. We used a  
259 plasmid based retrotransposition assay<sup>40</sup> and transiently co-transfected *Drosha\_KO1*  
260 and *Drosha\_KO2* with pCEP-L1WT reporter plasmid that carried *Neomycin* resistance  
261 (NeoR)<sup>41</sup> as a reporter along with either Ctrl mimic or mimics for miR-16-5p and miR-  
262 153-3p together to downregulate MOV10 expression. 500,000 cells were plated for  
263 each condition for the colony forming assay and media was supplemented with G418  
264 39 hours post transfection. The mean NeoR colonies obtained 15 days post selection  
265 were 25 and 23 in the two *Drosha\_KO* clones transfected with Ctrl mimics from 3  
266 independent experiments. A statistically significant increase in NeoR colonies in cells  
267 transfected with miRNA mimics was observed with the mean increasing to 178 and  
268 226 in the two clones respectively (Fig. 4D). Our results are in line with data from  
269 human cancer cells supporting the role for *Mov10* as a negative regulator of

270 retrotransposition<sup>23,47–50</sup>, and to our knowledge, the first to report a role for miRNAs in  
271 fine-tuning *Mov10* expression.

272 Mature miRNAs might regulate multiple mRNAs and an mRNA can be targeted by  
273 several miRNAs<sup>51</sup>. While we show that transfection with miR-16-5p and miR-153-3p  
274 mimics downregulates MOV10 expression leading to increased L1 mobility, we cannot  
275 unequivocally rule out that changes in expression of another gene targeted by these  
276 miRNAs might be responsible for the observed increase in transposition. To assess if  
277 MOV10 expression is sufficient to induce L1 RNP aggregation in the cytosol, we  
278 transiently transfected Ctrl, L1<sup>UP</sup> CI1, L1<sup>UP</sup> CI2 mESCs with a plasmid encoding HA  
279 tagged human MOV10 (HA-MOV10). In IF experiments with an antibody against HA  
280 to detect exogenously expressed HA-MOV10 along with anti-L1 ORF1 antibody, we  
281 detected HA-MOV10-ORF1 aggregates in the cytoplasm of L1<sup>UP</sup> CI1 and L1<sup>UP</sup> CI2  
282 significantly more than in Ctrl cell line (P-val < 0.001). The median number of foci  
283 observed in Ctrl was 6 per cell while in the two L1<sup>UP</sup> clones this was 15 (Fig. 5A).  
284 Additionally, the morphology of the larger HA-MOV10-ORF1 aggregates observed in  
285 L1<sup>UP</sup> clones was reminiscent of those observed in *Dicer*<sub>KO</sub> mESCs (Fig. 5A, Fig. 1B).  
286 To prove that MOV10 induced L1 RNP aggregation restricts L1 mobility, we then  
287 transiently co-transfected Ctrl, L1<sup>UP</sup>CI1 and L1<sup>UP</sup>CI2 mESCs with JJ-L1WT reporter  
288 plasmid that carries *BlastR reporter*<sup>41</sup> along with either Empty Vector (EV) or HA-  
289 MOV10 plasmids. The mean BlastR colonies was 35 and 29 for the two L1<sup>UP</sup> clones  
290 and 2 in Ctrl cells, corroborating our earlier observation of increased L1 mobility in  
291 L1<sup>UP</sup> cells as compared to Ctrl (Fig. 5B, Fig 3C). Importantly, a statistically significant  
292 decrease in BlastR colonies was observed in L1<sup>UP</sup> clones transfected with HA-MOV10  
293 when compared to EV with a mean of 1 BlastR colony obtained from the transfection  
294 in both the clones (Fig. 5B). Together, our data implicate that MOV10 is playing a  
295 direct role in cytosolic sequestration of L1 RNP thereby restricting retrotransposition  
296 and maintaining genome integrity in mESCs (Fig. 5C).

297

## 298 Discussion

299 The role of MOV10 in inhibiting retrotransposition in human tissue culture was  
300 discovered almost ten years ago<sup>23</sup>. Since then, multiple reports have corroborated  
301 this seminal function, where it participates either directly or along with protein partners  
302 in curbing retrotransposition<sup>47–50,52,53</sup>. Here, we discover cytosolic-body formation  
303 induced by MOV10 as a novel line of defense for sequestration of L1 RNP particles to

304 prevent deleterious L1 retrotransposition. It appears that L1 RNP aggregates in  
305 miRNA mutant mESCs are different from those observed upon ectopic overexpression  
306 of MOV10 and L1 in human cancer cells as the latter unlike in our study were found to  
307 be stress granules.

308 MOV10 is a known interactor of proteins that are a part of the miRNA induced silencing  
309 complex (RISC) and plays an important role in mRNA decay<sup>54</sup>. It also localizes with  
310 AGO and TNRC6 proteins in P-bodies<sup>55</sup>. L1 ORF1 protein has been previously  
311 reported to interact with P-body enriched proteins and RNA<sup>27,33</sup>. We hypothesize that  
312 the absence of AGO2 and mature miRNAs in the miRNA mutant mESCs prevent P-  
313 body formation and hinders similarly L1 ORF1 partitioning and LLPS. We think that  
314 the observed aggregates in mESCs have evolved as a specialized compartment  
315 where diverse activities for L1 RNP metabolism are brought together, which will  
316 require further dissection. MOV10 is a 5' to 3' RNA helicase<sup>56</sup> and its catalytic activity  
317 is essential for inhibiting human L1 retrotransposition<sup>23</sup>. Whether this activity is  
318 essential for inducing L1 RNP aggregate formation could provide further mechanistic  
319 insight.

320 Given the plethora of functions MOV10 has been implicated in, it is not surprising that  
321 mechanisms have evolved to regulate its expression and activity<sup>53</sup>. Post-translational  
322 modification of MOV10 occurs via ubiquitination in neuron cultures derived from rat  
323 hippocampus resulting in its degradation<sup>57</sup>. Moreover, phosphorylation and  
324 acetylation of MOV10 have been observed to occur in human cancer cell lines and  
325 speculated to regulate its activity and levels<sup>53</sup>. Data presented here, to the best of our  
326 knowledge, is a first to unveil miRNA mediated post-transcriptional regulation of  
327 *Mov10* expression. Since MOV10 expression levels observed in *Dicer\_KO* were  
328 higher than those in *Drosha\_KO* mESCs (Extended Data Fig. 3B) it is possible that  
329 expression of MOV10 might also be modulated by microprocessor independent  
330 miRNAs. While transient transfection with all four tested miRNAs resulted in  
331 downregulation of MOV10, the absence of synergistic effect for miR-16-5p and miR-  
332 30-5p may rise from the inherent closeness of the two MREs in the 3'UTR of *Mov10*  
333 causing steric hindrance and preventing the large RISC complex from binding the two  
334 simultaneously. MREs in *Mov10* for all four tested miRNAs miR-138-5p, miR-30-5p,  
335 miR-16-5p and miR-153-3p in mESCs are conserved in the 3'UTR sequence of  
336 hMOV10, raising the possibility that this mechanism regulating MOV10 expression  
337 may also be conserved in humans. Of note miR-138-5p and miR-153-3p are highly

338 expressed in the human brain <sup>58</sup> and both miRNAs are downregulated in brain  
339 pathologies from Alzheimer's Disease patients <sup>59,60</sup>. Activation of expression and  
340 mobility of transposable elements has been reported in a majority of neurological  
341 disorders <sup>61</sup> and certain cancers <sup>62</sup>. In case the mode of L1 regulation uncovered here  
342 in mESCs is conserved, fine-tuning MOV10 expression in disease conditions using  
343 miRNA mimics to downregulate or conversely Antagomirs to upregulate MOV10  
344 expression can afford novel means of therapy.

345

## 346 **Material and Methods**

### 347 **Cell culture**

348 E14TG2a mESC (ATCC CRL-1821) were used as wild type cells. *Dicer\_KO* <sup>13</sup> and  
349 *Drosha\_KO* <sup>46</sup> were previously generated from E14TG2a in our laboratory using a  
350 paired CRISPR-Cas9 approach <sup>63</sup>. Cells were cultured in Dulbecco's Modified Eagle's  
351 Medium (DMEM) (Invitrogen) supplemented with 15% pre-selected batch of FBS  
352 (GIBCO) tested for optimal mESCs growth, 1000 U/mL of LIF (Millipore), 0.1 mM of 2-  
353  $\beta$ -mercapto-ethanol (Life Technologies), 0.05 mg/mL of streptomycin, and 50 U/mL of  
354 penicillin (Sigma). For routine culturing cells were grown on 0.2% gelatin-coated cell  
355 culture grade plastic vessels in the absence of feeder cells. For microscopy coverslips  
356 were coated with 10  $\mu$ g/ml Fibronectin (Sigma, FC010) for at least 2 hours at 37°C,  
357 coverslips were washed three times with 1x PBS and cells were seeded 16-18 hours  
358 before processing them for microscopy. HEK293T cells were grown in Dulbecco's  
359 Modified Eagle's Medium (DMEM) (Invitrogen) supplemented with 10% FBS (GIBCO),  
360 0.05 mg/mL of streptomycin, and 50 U/mL of penicillin (Sigma). Concentration of  
361 various antibiotics used were as follows 1  $\mu$ g/ml Puromycin (Sigma), 100  $\mu$ g/ml  
362 Hygromycin (Invitrogen), 250  $\mu$ g/ml G418 (Sigma), 50  $\mu$ g/ml Blastidin (Invitrogen).

363

### 364 **Plasmids**

365 3'UTR sequence of mouse MOV10 transcript ENSMUST00000168015.8 was PCR  
366 amplified using Fwd 5'-taggcgatcgctcgaggccacagccgccgctt-3' and Rev 5'-  
367 ttgcggccagcggccttttgcataaacagcattttgt-3' primers using cDNA generated with  
368 random primers from mESCs as template. The PCR product was subcloned into  
369 plasmid psiCHECK2 (Promega) previously digested with NotI using the In-Fusion  
370 cloning kit (Takara Bio) giving rise to plasmid psiCHECK2-mMov10-3'UTR (addgene  
371 178905). Human MOV10 was PCR amplified with primers Fwd 5'-

372 ggtcggaggcggatccatgccagtaagttcagctgc-3' and Rev 5'-  
373 gatatctgcagaattctcagagctcattcctccactc-3' using plasmid pFLAG/HA-MOV10 (addgene  
374 10976)<sup>64</sup> as template and subcloned into BamH1 and Xho1 digested pCDNA3-T11-  
375 HA plasmid<sup>65</sup> a kind gift from Prof. Polymenidou using In-Fusion cloning kit (Takara)  
376 to yield plasmid pCDNA3-T11HA-hMOV10-WT (addgene 178907) for transient  
377 transfections to over express MOV10 in L1<sup>UP</sup> and Ctrl cells. Plasmids used for the  
378 retrotransposition assay with mneo1 cassette as reporter was pCEP-L1SM (hygro)  
379 and with mblast1 cassette was JJ-L1SM WT and JJ-L1SM N21A (hygro), all gifts from  
380 Prof. Garcia-Perez.

381

### 382 **Generation of L1<sup>UP</sup> mESCs using CRISPRa**

383 L1<sup>UP</sup> mESCs were generated from E14TG2a mESCs using the CRISPRa approach  
384 <sup>66</sup>. Single gRNAs (sgRNAs) were designed using the L1 Tf consensus sequences  
385 (Extended Data Fig. 2B)<sup>67</sup>. Sequence alignments<sup>6,67,68</sup> were performed using T-  
386 Coffee<sup>69</sup>. SgRNAs to upregulate L1 Tf were individually sub-cloned into the plasmid  
387 pKLV-U6gRNA(BbsI)-PGKpuro2ABFP a gift from Prof. Yusa (addgene 50946),<sup>70</sup>,  
388 using the BbsI restriction site. Guide sequence used for generating Cl1 was 5'-  
389 caccgccagagaacctgacagcttc-3' (addgene nb pending) For Cl2 two guide pairs were  
390 used 5'-caccgccagagaacctgacagcttc-3' (addgene nb pending, same as for Cl1) and  
391 5'-caccagaggacaggtgcccgcctt-3' (addgene nb pending). AC95-pmax-dCas9VP160-  
392 2A-neo was a gift from Prof. Jaenish (addgene 48227)<sup>66</sup>. Cells were transfected with  
393 1 µg of each plasmid and 24h hours post transfection they were cultured in presence  
394 of puromycin (1 µg/mL) and G418 (250 µg/mL). Single clones were picked one week  
395 post transfection. The first screening for selection of L1<sup>UP</sup> candidates was performed  
396 at the protein level for ORF1 expression by immunoblot analysis.

397

### 398 **Ectopic protein expression**

399 L1<sup>UP</sup> and Ctrl mESC lines were transiently transfected with 2 µg T11HA-hMOV10  
400 plasmid (addgene nb pending) for ectopic expression of hMOV10 or T11HA-EV<sup>65</sup> as  
401 empty vector control using Lipofectamine 3000 (Invitrogen). Transfection complex was  
402 removed 6 hours post transfection. Cells were trypsinized 32 hours post transfection  
403 and plated on fibronectin coated cover slips. Samples were processed 48 hours post  
404 transfection for Indirect Immunofluorescence (IF).

405

#### 406 **MiRNA mimic transfections in mESCs**

407 100,000 *Drosha*\_KO mESCs were seeded per well in a 6 well plate in duplicate for  
408 respective miRNA mimic transfections. Cells were grown in antibiotic free media and  
409 transfected with 20 nM mimic when transfected singly or 10 nM respective mimic for  
410 dual transfections using RNAimax reagent (Invitrogen). Cells were harvested 39 hours  
411 post transfection and duplicate samples were pooled for protein extraction and  
412 subsequent western blot analysis. The following miRNA mimics (Dharmacon, A  
413 horizon discovery Group company) were used:

414 mmu-miR-16-5p 5'-UAGCAGCACGUAAAUUUGGCG-3' (C-310511-05-05)

415 mmu-miR-30e-5p 5'-UGUAAACAUCUUGACUGGAAG-3' (C-310466-07-0002)

416 mmu-miR-138-5p 5'-AGCUGGUGUUGUGAAUCAGGCCG-3' (C310414-07-0002)

417 mmu-miR-153-3p 5'-UUGCAUUAGUCACAAAAGUGAUC-3'(C310428-05-0002)

418 miRIDIAN microRNA negative control 1 (CN-001000-01-05)

419

#### 420 **Indirect Immunofluorescence (IF)**

421 Cells grown on coverslips were washed with 1x PBS, fixed with 3.7% formaldehyde  
422 (Sigma) in 1x PBS for 10 minutes at room temperature. Post fixation cells were washed  
423 three times in 1x PBS and permeabilized with CSK buffer (100 mM NaCl, 300 mM  
424 sucrose, 3 mM MgCl<sub>2</sub>, 10 mM PIPES pH 6.8, 0.5% Triton-X) for 4 minutes on ice. After  
425 three further washes with 1x PBS, blocking was initiated in 1x PBS supplemented with  
426 1% BSA and 0.1% Tween-20 for 30 minutes at room temperature. Samples were  
427 incubated with primary antibody diluted in blocking buffer for 1 hour at room  
428 temperature, there after washed three times with 1x PBS-0.1% Tween-20, incubated  
429 with secondary antibody diluted in blocking solution for 1 hour and counterstained with  
430 100ng/ml DAPI (Sigma) in 1x PBS for 4 minutes before mounting on slides in  
431 Vectashield (Vector labs). The following primary antibodies diluted in blocking buffer  
432 were used: rabbit polyclonal anti-ORF1p (1:1000 kind gift from Donal O'Carroll),  
433 mouse monoclonal 15C1BB anti-MOV10 (1:500, A500-009A-T Bethyl Laboratories  
434 Inc), rabbit polyclonal anti-G3BP1 (1:500 A302-033A, Bethyl Laboratories Inc), rabbit  
435 polyclonal anti-LC3B antibody (1:250, 2775, Cell Signaling Technology), rabbit  
436 polyclonal anti-DDX6 (1:500, GTX102795, GeneTex), rat monoclonal anti-HA (1:500,  
437 3F10, Roche). Secondary antibody used were Alexa fluor 488 goat anti-rat IgG  
438 (1:4000, 11006, life Technologies), Alexa fluor 488 donkey anti-mouse IgG (1:4000,  
439 A21202, Life technologies), Alexa fluor 546 donkey anti-rabbit IgG (1:4000, A10040,

440 Life technologies), Alexa fluor 647 donkey anti-mouse IgG (1:4000, A31571, Life  
441 technologies). Images were acquired using the Deltavision multiplex system equipped  
442 with an Olympus 1X71 (inverse) microscope, pco.edge 5.5 camera and 60x 1.4NA  
443 DIC Oil PlanApoN objective. Z stacks were taken 0.2  $\mu\text{m}$  apart, images de-convolved  
444 using Softworx software. Further image analysis and processing were performed using  
445 ImageJ. Excel (Microsoft) and Prism 9 (Graphpad) were used for data analysis and  
446 statistical testing.

447

#### 448 **Combined RNA FISH and IF**

449 Cells grown on coverslips were first processed for IF following the protocol described  
450 above except all buffers and solution other than the fixative were also supplemented  
451 with 10 mM Ribonucleoside Vanadyl Complex (NEB). After incubation with the  
452 secondary antibody, cells were fixed with 3.7% formaldehyde in 1x PBS for 10 minutes  
453 at room temperature and blocked in 1x PBS supplemented with 1% BSA, 0.1% Tween-  
454 20, 2 mM Glycine and 10 mM RVC for 15 minutes. Cells were next washed and  
455 incubated in 2x SSC (0.03 M Sodium citrate in 0.3 M Sodium chloride) for 5 minutes.  
456 Probe specific for Tf L1 family was labeled with Red-dUTP (Enzo Life sciences) using  
457 a nick translation kit (Abbot). 2  $\mu\text{g}$  TFkan plasmid kind gift from Prof. Heard<sup>71,72</sup> as  
458 incubated with 0.2 mM labelled dUTP, 0.1 mM dTTP, 0.1 mM dNTP mix and 2.5  $\mu\text{l}$   
459 nick translation enzyme in a 50  $\mu\text{l}$  final volume as per guidelines from the kit. The  
460 reaction was incubated at 15°C for 15 hours. A PCR purification column (zymogen)  
461 was used to clean the probe which was eluted in 50  $\mu\text{l}$  water. The volume of the probe  
462 was decreased down to 5  $\mu\text{l}$  using a speed vac, and the probe was diluted in 100  $\mu\text{l}$   
463 hybridization solution (1 part 20x SSC, 2 parts 10 mg/ml BSA, 2 parts 50% Dextran  
464 sulfate and 5 parts deionized formamide). The probe solution was denatured at 78°C  
465 for 5 minutes, placed on ice for 5 minutes and 7  $\mu\text{l}$  probe was spotted on a pre-baked  
466 slide for each sample. During the overnight hybridization at 37°C in a humid chamber  
467 the overturned coverslips were sealed using rubber cement. Post hybridization  
468 washes were performed with 50% formamide in 2x SSC thrice for five minutes followed  
469 by 3 washes with 2x SSC. DNA was counterstained with 100 ng/ml DAPI in 2x SSC  
470 and mounted on slides with Vectashield. Image acquisition and analysis was as for IF.

471

#### 472 **Western blot analysis**

473 Total cellular protein was extracted from mESC pellets using a NP40 based lysis buffer  
474 (1% NP40, 137 mM NaCl, 20 mM Tris-HCl, 1 mM EDTA) complemented with EDTA-  
475 free protease inhibitor cocktail (Roche). Protein concentrations were determined by  
476 Bradford Assay (Bio-Rad). 10-20 µg of total cellular protein were separated in 8% or  
477 10% SDS-PAGE gels and transferred on PVDF membranes. The following antibodies  
478 were used: rabbit polyclonal anti L1 ORF1p (1:5000, gift from Donal O'Carroll), rabbit  
479 polyclonal anti-Dicer (1:2000, SAB42000087, Sigma), rabbit polyclonal anti-  
480 Argonaute2 (1:2000 C34C6 Cell Signaling Technologies), rabbit anti-Drosha (1:2000,  
481 D28B1 Cell Signaling Technology), rat monoclonal anti-HA (1:500, 3F10, Roche),  
482 Mouse anti-Tubulin antibody (1:10000, A01410, GenScript), rabbit anti-LaminB1  
483 (1:5000, ab16048, Abcam), rabbit anti-DDX6 (1:2000, GTX102795 GeneTex), anti-  
484 rabbit IgG HRP-linked (1:10000 7074, Cell Signaling Technologies), anti-mouse IgG  
485 HRP-linked (1:10000, 7076, Cell Signaling Technologies), anti-rat IgG HRP-linked  
486 antibody (1:10000, 7077, Cell Signaling Technologies). Immunoblot blot were  
487 developed using the Clarify™ Western ECL substrate (BioRad) kit or SuperSignal™  
488 West Femto Maximum Sensitivity Substrate (Thermo Scientific) and detected using  
489 ChemiDoc™ MP imaging system (BioRad). All membranes were stained with  
490 coomassie to ensure equal loading.

491

#### 492 **RT qPCR analysis**

493 Total cellular RNA was extracted from cell pellets using TRizol® Reagent (Life  
494 Technologies). Extract quality was verified by loading 1 µg of total cellular RNA on a  
495 1% Agarose gel. 1 µg cellular RNA was treated with DNase (RQ1 Rnase-Free DNase  
496 kit Promega) and reverse-transcribed following the GoScript™ Reverse Transcriptase  
497 Kit (Promega) manufacturer's instructions. The produced cDNAs were diluted five-fold  
498 in distilled water. For each extract, PCR on the *Rrm2* gene were performed, with and  
499 without reverse transcriptase treatment, to insure absence of genomic DNA  
500 contamination. The quality-controlled cDNAs were diluted two times in distilled water.  
501 Amplifications were performed on the Light Cycler® 480 (Roche) using 2 µL of the  
502 diluted cDNAs and the KAPA SYBR® FAST qPCR Kit Optimized for Light Cycler®  
503 480 (KAPA biosystems). Differences between samples and controls were calculated  
504 based on the  $2^{-\Delta CT}$  method. RT-qPCR assays were performed in biological triplicate.  
505 Primers utilized for the RT-qPCR assays are as follows: *Rrm2* fwd 5'-  
506 ccgagctggaaagtaaagcg-3', *Rrm2* rev 5'-atgggaaagacaacgaagcg-3', *Mov10* fwd 5'-



507 gacgatttacaaccacgacttca-3', Mov10rev 5'-gccagatttgcgatcttcattcc-3', Dicerfwd 5'-  
508 ccgatgatgcagcctctaataag-3' Dicerrev 5'-tccatctcgagcaattctctca-3', L1-Tffwd 5'-  
509 cagcggtcgccatcttg-3', L1-Tfrev 5'-caccctctcacctgttcagactaa-3',  
510 L1-Afwd 5'-ggattccacacgtgatcctaa-3', L1-Arev 5'-tcctctatgagcagacctgga-3', L1-Gffwd  
511 5'-ctccttggtccgggact-3', L1-Gfrev 5'-caggaaggtggccggttg-3', L1-ORF1fwd 5'-  
512 actcaaagcaggcaacact-3' L1-ORF1rev 5'-ctttgattgttgccgatg-3', L1-ORF2fwd 5'-  
513 ggagggacatttcattctcatca-3', L1-ORF2rev 5'-gctgctctgtattggagcataga-3'.

514

### 515 **Northern Blot analysis**

516 Northern blot analysis was performed as previously described<sup>13,73</sup>. 30 µg of total RNAs  
517 extracted using Trizol were run on a denaturing 1% Agarose gel with 1%  
518 Formaldehyde. Following capillary transfer to nylon membranes overnight the  
519 membrane was cross-linked by UV radiation. PerfectHyb<sup>TM</sup> Plus was used for pre  
520 hybridization blocking and hybridization at 42°C. Post hybridization washes were  
521 performed in 2x SSC + 0.1% SDS. For detection of full-length L1 transcripts, random  
522 primer extension labeling was carried out. DNA used for the reaction was PCR  
523 amplified using E14TG2a mESCs genomic DNA as template and L1specific primers  
524 Fwd 5'-gagttttgagtctgtatcc-3' and Rev 5'-ctctccttagtttcagtgg-3'.

525

### 526 **Dual luciferase reporter assay**

527 70,000 HEK293T cells were plated per well in a 24 well plate 16 hours prior to  
528 transfection with Lipofectamine 2000 (Invitrogen). 0.5 µg of plasmid psiCHECK2-  
529 3'UTR-WT-Mov10'UTR was co-transfected with 50 nM indicated miRNA mimics or  
530 control mimic. Transfection complexes were removed 6 hours post transfection.  
531 Luciferase activity was measured on a GloMax<sup>®</sup> Discover Multimode Microplate  
532 Reader (Promega, USA) after processing cells using the Dual-Glow Luciferase Assay  
533 kit (E2920 Promega, USA) 48 hours post transfection. Results are means and error  
534 bars are standard deviation (SD) from three to four independent experiments.

535

### 536 **Retrotransposition reporter and colony forming assays**

537  $1 \times 10^6$  L1<sup>UP</sup> and Ctrl mESCs were seeded in 10 cm dish 16 hours prior to transfection  
538 with 6 µg of JJ-L1SM (WT and L1N21A) plasmid using Lipofectamine 3000  
539 (Invitrogen). Media exchange was initiated 6 hours post transfection and hygromycin

540 supplemented media was added 48 hours post transfection to select for stably  
541 transfected cells. Once the mock transfected cells were dead, 150,000 hygromycin  
542 resistant cells were seeded per well in a 6 well plate in triplicate and grown in media  
543 *sans* hygromycin for 16 hours after which the media was supplemented with  
544 Blastidicin. Media exchange with fresh antibiotics was performed every 48 hours for  
545 approximately 15 days, when individual Blastidicin resistant colonies were visible with  
546 the naked eye. Cells were washed with 1x PBS and stained with 1% crystal violet blue,  
547 1% formaldehyde, 1% methanol for 20 minutes at room temperature, followed by  
548 washes with tap water. Plates were air dried and imaged using the ChemiDoc™ MP  
549 system (BioRad). Individual colonies were counted using ImageJ. Results are means  
550 and error bars are SD from three independent transfections.

551 Transient transfections of reporter plasmids were carried out using Lipofectamine  
552 3000 (Invitrogen) when co-transfections with miRNA mimics or plasmids for ectopic  
553 expression of hMOV10 were assayed for retrotransposition. 500,000 cells were  
554 seeded for transient transfection with 6 µg of reporter plasmid and either 10 nM mimic  
555 for mmu-miR-16-5p + 10 nM mmu-miR-153-3p mimic or 6 µg of plasmid T11HA-EV or  
556 T11HA-hMOV10. Media exchange was initiated 6 hours post transfection. 39 hours  
557 post transfection cells were grown in media supplemented with antibiotic resistance  
558 encoded by the respective cassette. Subsequent media exchanges, staining and  
559 counting of colonies, was the same as stated for stably transfected cells. Results are  
560 means and error bars are SD from three independent transfections.

561

## 562 **Acknowledgments**

563 We would like to thank the members of the Ciaudo lab and Dr Tobias Beyer for fruitful  
564 discussions and the critical reading of this manuscript. This work was supported by  
565 the Swiss National Science Foundation (grants 31003A\_173120 and 310030\_196861)  
566 and Novartis Foundation for medical-biological Research (grant 19A018) to C.C. In  
567 addition, R.A and C.C. were supported by the NCCR RNA and Disease. We also want  
568 to thank the ScopeM facility at ETH Zürich for their support with microscopy and image  
569 analysis.

570

## 571 **Author Contributions**

572 Conceptualization, RA, MB and CC, laboratory experiments RA, MB, LP, CH; writing  
573 original draft preparation, RA and CC; writing, review and editing, CC; visualization,  
574 RA, MB and CC; supervision, CC; funding acquisition, CC. All authors have read and  
575 agreed to the published version of the manuscript.

576

## 577 Declaration of Interests

578 The authors declare no financial and non-financial competing interests.

579

## 580 References

- 581 1. Lander, E. S. *et al.* Initial sequencing and analysis of the human genome. *Nat.* 2001 4096822  
582 409, 860–921 (2001).
- 583 2. Waterston, R. H. *et al.* Initial sequencing and comparative analysis of the mouse genome.  
584 *Nature* 420, 520–562 (2002).
- 585 3. Beck, C. R., Garcia-Perez, J. L., Badge, R. M. & Moran, J. V. LINE-1 elements in structural  
586 variation and disease. *Annual Review of Genomics and Human Genetics* vol. 12 187–215  
587 (2011).
- 588 4. Jachowicz, J. W. & Torres-Padilla, M. E. LINEs in mice: features, families, and potential roles in  
589 early development. *Chromosoma* vol. 125 29–39 (2016).
- 590 5. Brouha, B. *et al.* Hot L1s account for the bulk of retrotransposition in the human population.  
591 *Proc. Natl. Acad. Sci. U. S. A.* 100, 5280–5285 (2003).
- 592 6. Goodier, J. L., Ostertag, E. M., Du, K., Kazazian, J. & Kazazian H.H., J. A novel active L1  
593 retrotransposon subfamily in the mouse. *Genome Res.* 11, 1677–1685 (2001).
- 594 7. Naas, T. P. *et al.* An actively retrotransposing, novel subfamily of mouse L1 elements. *EMBO J.*  
595 17, 590–597 (1998).
- 596 8. Goodier, J. L., Ostertag, E. M., Du, K. & Kazazian, J. A novel active L1 retrotransposon subfamily  
597 in the mouse. *Genome Res.* 11, 1677–1685 (2001).
- 598 9. Deberardinis, R. J. & Kazazian, H. H. Analysis of the promoter from an expanding mouse  
599 retrotransposon subfamily. *Genomics* 56, 317–323 (1999).
- 600 10. Newkirk, S. J. *et al.* Intact piRNA pathway prevents L1 mobilization in male meiosis. *Proc. Natl.*  
601 *Acad. Sci. U. S. A.* 114, E5635–E5644 (2017).
- 602 11. DiGiacomo, M. *et al.* Multiple Epigenetic Mechanisms and the piRNA Pathway Enforce LINE1  
603 Silencing during Adult Spermatogenesis. *Mol. Cell* 50, 601–608 (2013).
- 604 12. Goodier, J. L. Restricting retrotransposons: A review. *Mobile DNA* vol. 7 (2016).
- 605 13. Bodak, M., Cirera-Salinas, D., Yu, J., Ngondo, R. P. & Ciaudo, C. Dicer, a new regulator of  
606 pluripotency exit and LINE-1 elements in mouse embryonic stem cells. *FEBS Open Bio* 7, 204–  
607 220 (2017).
- 608 14. Ha, M. & Kim, V. N. Regulation of microRNA biogenesis. *Nature Reviews Molecular Cell Biology*  
609 vol. 15 509–524 (2014).
- 610 15. Bartel, D. P. Metazoan MicroRNAs. *Cell* vol. 173 20–51 (2018).
- 611 16. Svoboda, P. *et al.* RNAi and expression of retrotransposons MuERV-L and IAP in  
612 preimplantation mouse embryos. *Dev. Biol.* 269, 276–285 (2004).
- 613 17. Kanellopoulou, C. *et al.* Dicer-deficient mouse embryonic stem cells are defective in  
614 differentiation and centromeric silencing. *Genes Dev.* 19, 489–501 (2005).

- 615 18. Hamdorf, M. *et al.* miR-128 represses L1 retrotransposition by binding directly to L1 RNA. *Nat. Struct. Mol. Biol.* 2015 2210 **22**, 824–831 (2015).  
616
- 617 19. Idica, A. *et al.* MicroRNA miR-128 represses LINE-1 (L1) retrotransposition by down-regulating  
618 the nuclear import factor TNPO1. *J. Biol. Chem.* **292**, 20494–20508 (2017).
- 619 20. Bodak, M., Yu, J. & Ciaudo, C. Regulation of LINE-1 Elements by miR-128 Is Not Conserved in  
620 Mouse Embryonic Stem Cells. *Front. Genet.* **9**, (2018).
- 621 21. Tristán-Ramos, P. *et al.* The tumor suppressor microRNA let-7 inhibits human LINE-1  
622 retrotransposition. *Nat. Commun.* **11**, 1–14 (2020).
- 623 22. Viswanathan, S. R., Daley, G. Q. & Gregory, R. I. Selective Blockade of MicroRNA Processing  
624 by Lin28. *Science*. **320**, 97–100 (2008).
- 625 23. Goodier, J. L., Cheung, L. E. & Kazazian, H. H. MOV10 RNA Helicase Is a Potent Inhibitor of  
626 Retrotransposition in Cells. *PLoS Genet.* **8**, (2012).
- 627 24. Doucet, A. J., Hulme, A. E., Sahinovic, E., Kulpa, D. A. & Moldovan, J. B. Characterization of  
628 LINE-1 Ribonucleoprotein Particles. *PLoS Genet* **6**, 1001150 (2010).
- 629 25. Taylor, M. S. *et al.* Affinity proteomics reveals human host factors implicated in discrete stages  
630 of LINE-1 retrotransposition. *Cell* **155**, (2013).
- 631 26. Taylor, M. S. *et al.* Dissection of affinity captured LINE-1 macromolecular complexes. *Elife* **7**,  
632 (2018).
- 633 27. Goodier, J. L., Zhang, L., Vetter, M. R. & Kazazian, H. H. LINE-1 ORF1 Protein Localizes in  
634 Stress Granules with Other RNA-Binding Proteins, Including Components of RNA Interference  
635 RNA-Induced Silencing Complex. *Mol. Cell. Biol.* **27**, 6469–6483 (2007).
- 636 28. Kedersha, N. *et al.* G3BP–Caprin1–USP10 complexes mediate stress granule condensation  
637 and associate with 40S subunits. *J. Cell Biol.* **212**, 845–860 (2016).
- 638 29. Wheeler, J. R., Matheny, T., Jain, S., Abrisch, R. & Parker, R. Distinct stages in stress granule  
639 assembly and disassembly. *Elife* **5**, (2016).
- 640 30. Roden, C. & Gladfelter, A. S. RNA contributions to the form and function of biomolecular  
641 condensates. *Nature Reviews Molecular Cell Biology* vol. 22 (2021).
- 642 31. Newton, J. C. *et al.* Phase separation of the LINE-1 ORF1 protein is mediated by the N-terminus  
643 and coiled-coil domain. *Biophys. J.* **120**, 2181–2191 (2021).
- 644 32. Valsecchi, C. I. K. *et al.* RNA nucleation by MSL2 induces selective X chromosome  
645 compartmentalization. *Nature* **589**, (2021).
- 646 33. Briggs, E. M. *et al.* RIP-seq reveals LINE-1 ORF1p association with p-body enriched mRNAs.  
647 *Mob. DNA* 2021 121 **12**, 1–13 (2021).
- 648 34. Luo, Y., Na, Z. & Slavoff, S. A. P-Bodies: Composition, Properties, and Functions. *Biochemistry*  
649 **57**, (2018).
- 650 35. Sen, G. L. & Blau, H. M. Argonaute 2/RISC resides in sites of mammalian mRNA decay known  
651 as cytoplasmic bodies. *Nat. Cell Biol.* 2005 76 **7**, 633–636 (2005).
- 652 36. Eulalio, A., Behm-Ansmant, I., Schweizer, D. & Izaurralde, E. P-Body Formation Is a  
653 Consequence, Not the Cause, of RNA-Mediated Gene Silencing. *Mol. Cell. Biol.* **27**, 3970  
654 (2007).
- 655 37. Pauley, K. M. *et al.* Formation of GW bodies is a consequence of microRNA genesis. *EMBO*  
656 *Reports* vol. 7 904 (European Molecular Biology Organization, 2006).
- 657 38. Ayache, J. *et al.* P-body assembly requires DDX6 repression complexes rather than decay or  
658 Ataxin2/2L complexes. *Mol. Biol. Cell* **26**, 2579–2595 (2015).
- 659 39. Guo, H. *et al.* Autophagy supports genomic stability by degrading retrotransposon RNA. *Nat.*  
660 *Commun.* 2014 51 **5**, 1–11 (2014).
- 661 40. Kopera, H. C. *et al.* LINE-1 Cultured Cell Retrotransposition Assay. *Methods Mol. Biol.* **1400**,  
662 139 (2016).

- 663 41. Maclennan, M. *et al.* Mobilization of LINE-1 retrotransposons is restricted by Tex19.1 in mouse  
664 embryonic stem cells. *Elife* **6**, (2017).
- 665 42. Wei, W. *et al.* Human L1 Retrotransposition: cis Preference versus trans Complementation. *Mol.*  
666 *Cell. Biol.* **21**, 1429–1439 (2001).
- 667 43. Agarwal, V., Bell, G. W., Nam, J. W. & Bartel, D. P. Predicting effective microRNA target sites  
668 in mammalian mRNAs. *Elife* **4**, (2015).
- 669 44. Ngondo, R. P. *et al.* Argonaute 2 Is Required for Extra-embryonic Endoderm Differentiation of  
670 Mouse Embryonic Stem Cells. *Stem Cell Reports* **10**, 461 (2018).
- 671 45. Jin, Y., Chen, Z., Liu, X. & Zhou, X. Evaluating the MicroRNA Targeting Sites by Luciferase  
672 Reporter Gene Assay. *Methods Mol. Biol.* **936**, 117–127 (2013).
- 673 46. Cirera-Salinas, D., Bodak, M. & Ciaudo, C. *Versatility of DGCR8 controls stem cell fate.* *Cell*  
674 *Cycle* vol. 16 729–730 (Taylor and Francis Inc., 2017).
- 675 47. Arjan-Odedra, S., Swanson, C. M., Sherer, N. M., Wolinsky, S. M. & Malim, M. H. Endogenous  
676 MOV10 inhibits the retrotransposition of endogenous retroelements but not the replication of  
677 exogenous retroviruses. *Retrovirology* **9**, (2012).
- 678 48. Li, X. *et al.* The MOV10 helicase inhibits LINE-1 mobility. *J. Biol. Chem.* **288**, (2013).
- 679 49. Choi, J., Hwang, S. Y. & Ahn, K. Interplay between RNASEH2 and MOV10 controls LINE-1  
680 retrotransposition. *Nucleic Acids Res.* **46**, 1912–1926 (2018).
- 681 50. Warkocki, Z. *et al.* Uridylation by TUT4/7 Restricts Retrotransposition of Human LINE-1s. *Cell*  
682 **174**, (2018).
- 683 51. Peter, M. E. Targeting of mRNAs by multiple miRNAs: the next step. *Oncogene* 2010 2915 **29**,  
684 2161–2164 (2010).
- 685 52. Skariah, G. *et al.* Mov10 suppresses retroelements and regulates neuronal development and  
686 function in the developing brain. **15**, (2017).
- 687 53. Nawaz, A., Shilikbay, T., Skariah, G. & Ceman, S. Unwinding the roles of RNA helicase MOV10.  
688 *Wiley Interdisciplinary Reviews: RNA* e1682 (2021) doi:10.1002/wrna.1682.
- 689 54. Kenny, P. J. *et al.* MOV10 and FMRP Regulate AGO2 Association with MicroRNA Recognition  
690 Elements. *Cell Rep.* **9**, (2014).
- 691 55. Meister, G. *et al.* Identification of novel argonaute-associated proteins. *Curr. Biol.* **15**, 2149–  
692 2155 (2005).
- 693 56. Gregersen, L. H. *et al.* MOV10 Is a 5' to 3' RNA Helicase Contributing to UPF1 mRNA Target  
694 Degradation by Translocation along 3' UTRs. *Mol. Cell* **54**, (2014).
- 695 57. Banerjee, S., Neveu, P. & Kosik, K. S. A Coordinated Local Translational Control Point at the  
696 Synapse Involving Relief from Silencing and MOV10 Degradation. *Neuron* **64**, 871–884 (2009).
- 697 58. Ludwig, N. *et al.* Distribution of miRNA expression across human tissues. *Nucleic Acids Res.*  
698 **44**, 3865–3877 (2016).
- 699 59. Dobricic, V. *et al.* Differential microRNA expression analyses across two brain regions in  
700 Alzheimer's disease. *bioRxiv* 2021.05.31.446406 (2021) doi:10.1101/2021.05.31.446406.
- 701 60. Long, J. M., Ray, B. & Lahiri, D. K. MicroRNA-153 physiologically inhibits expression of amyloid-  
702  $\beta$  precursor protein in cultured human fetal brain cells and is dysregulated in a subset of  
703 Alzheimer disease patients. *J. Biol. Chem.* **287**, 31298–31310 (2012).
- 704 61. Terry, D. M. & Devine, S. E. Aberrantly High Levels of Somatic LINE-1 Expression and  
705 Retrotransposition in Human Neurological Disorders. *Frontiers in Genetics* vol. 10 1244 (2020).
- 706 62. Xiao-Jie, L., Hui-Ying, X., Qi, X., Jiang, X. & Shi-Jie, M. LINE-1 in cancer: Multifaceted functions  
707 and potential clinical implications. *Genetics in Medicine* vol. 18 431–439 (2016).
- 708 63. Wettstein, R., Bodak, M. & Ciaudo, C. Generation of a Knockout Mouse Embryonic Stem Cell  
709 Line Using a Paired CRISPR/Cas9 Genome Engineering Tool. *Methods Mol. Biol.* **1341**, (2016).
- 710 64. Meister, G. *et al.* Identification of novel argonaute-associated proteins. *Curr. Biol.* **15**, (2005).

- 711 65. Foglieni, C. *et al.* Split GFP technologies to structurally characterize and quantify functional  
712 biomolecular interactions of FTD-related proteins. *Sci. Rep.* **7**, (2017).
- 713 66. Cheng, A. W. *et al.* Multiplexed activation of endogenous genes by CRISPR-on, an RNA-guided  
714 transcriptional activator system. *Cell Res.* **23**, (2013).
- 715 67. Naas, T. P. *et al.* An actively retrotransposing, novel subfamily of mouse L1 elements. *EMBO J.*  
716 **17**, 590–597 (1998).
- 717 68. Schichman, S. A., Adey, N. B., Edgell, M. H. & Hutchison, C. A. L1 A-monomer tandem arrays  
718 have expanded during the course of mouse L1 evolution. *Mol. Biol. Evol.* **10**, (1993).
- 719 69. Notredame, C., Higgins, D. G. & Heringa, J. T-Coffee: A novel method for fast and accurate  
720 multiple sequence alignment. *J. Mol. Biol.* **302**, 205–217 (2000).
- 721 70. Koike-Yusa, H., Li, Y., Tan, E. P., Velasco-Herrera, M. D. C. & Yusa, K. Genome-wide recessive  
722 genetic screening in mammalian cells with a lentiviral CRISPR-guide RNA library. *Nat.*  
723 *Biotechnol.* **32**, (2014).
- 724 71. Chow, J. C. *et al.* LINE-1 activity in facultative heterochromatin formation during X chromosome  
725 inactivation. *Cell* **141**, 956–969 (2010).
- 726 72. Deberardinis, R. J. & Kazazian, H. H. Analysis of the promoter from an expanding mouse  
727 retrotransposon subfamily. *Genomics* **56**, 317–323 (1999).
- 728 73. Kuramochi-Miyagawa, S. *et al.* DNA methylation of retrotransposon genes is regulated by Piwi  
729 family members MILI and MIWI2 in murine fetal testes. *Genes Dev.* **22**, 908–917 (2008).
- 730
- 731

732 **Figure 1**

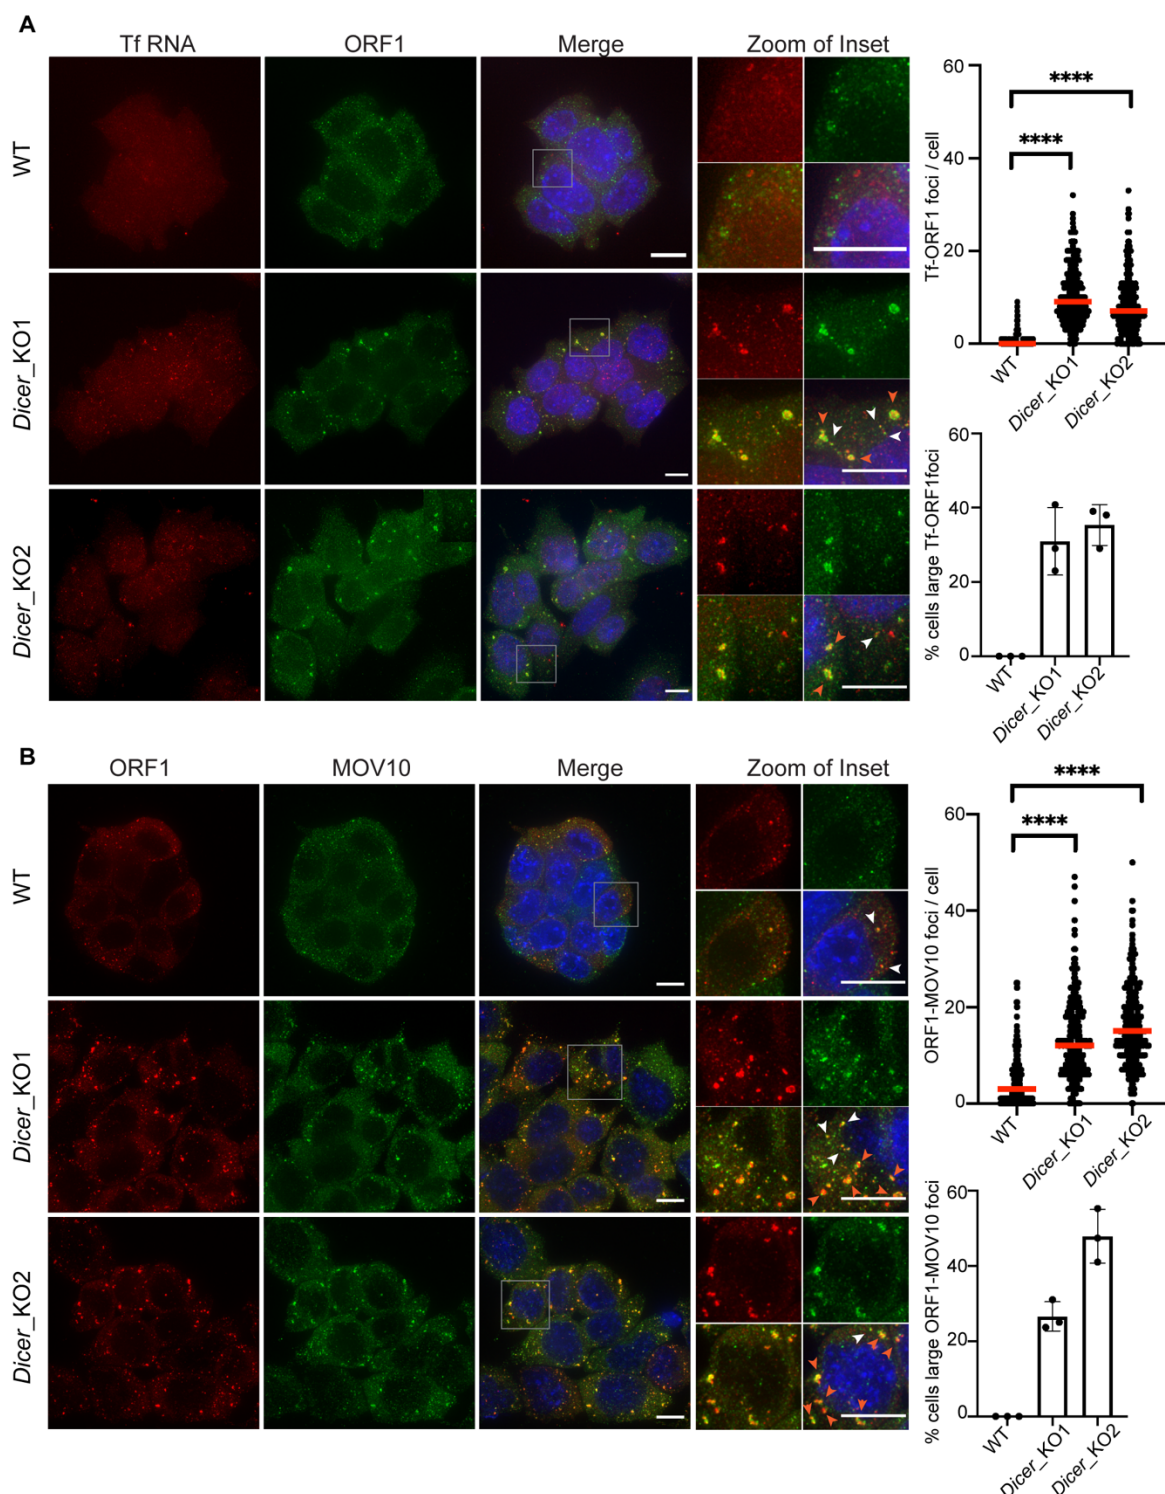

733

734 **Figure 1. L1 RNP accumulate as cytoplasmic foci in *Dicer\_KO* mESCs** (A) Maximum intensity  
 735 projections across Z stacks of example images from indicated mESCs stained for L1 Tf RNA (red)  
 736 combined with immunostaining for L1 ORF1 protein (green) and nuclei stained with DAPI (blue). The  
 737 grey square marks position of the inset. White arrow heads point to cytoplasmic foci where L1 RNA and  
 738 ORF1 protein co-localize. Red arrow heads point to relatively larger sized L1 RNP foci. Data collected  
 739 from 275 WT, 304 *Dicer\_KO1*, 311 *Dicer\_KO2* cells from three independent experiments are depicted

740 as scatter plots where circles are single data points representing number of co-localized L1 Tf-ORF1  
741 foci in the cytoplasm per cell, red bar is median for the distribution. P-value was determined using Mann-  
742 Whitney *U* test and \*\*\*\* represent p-value < 0.0001. In *Dicer\_KO* cells, L1 RNA and protein co-localize  
743 in variably sized foci in the cytoplasm. Bar graphs are mean values of percentage of cells with large L1  
744 Tf-ORF1 foci co-localizing in the cytoplasm. Dots represent data from three independent experiments,  
745 error bars are standard deviations. Scale bar 5  $\mu$ m. **(B)** Maximum intensity projections across Z stacks  
746 of example images from indicated mESCs immunostained for L1 ORF1 (red), MOV10 (green) and  
747 nuclei stained with DAPI (blue). The grey square marks position of inset in the zoomed image. White  
748 arrow heads point to cytoplasmic foci where L1 ORF1 and MOV10 co-localize. Red arrow heads point  
749 to relatively larger sized L1 ORF1-MOV10 foci. Data collected from 293 WT, 295 *Dicer\_KO1*, 295  
750 *Dicer\_KO2* cells from three independent experiments are depicted as scatter plots where circles are  
751 single data points representing number of co-localized L1 ORF1-MOV10 foci in the cytoplasm per cell,  
752 red bar is median for the distribution. In *Dicer\_KO* cells, L1 ORF1 and MOV10 proteins co-localize in  
753 the cytoplasm. P-value was determined using Mann-Whitney *U* test and \*\*\*\* represent p-value < 0.0001.  
754 Bar graphs are mean values of percentage of cells with large L1 ORF1-MOV10 foci co-localizing in the  
755 cytoplasm. Dots represent data from three independent experiments, error bars are standard  
756 deviations. Scale bar 5  $\mu$ m.

757

758

759

760

761

762

763

764

765

766

767

768

769

770

771

772

773

774

775



776 **Figure 2**

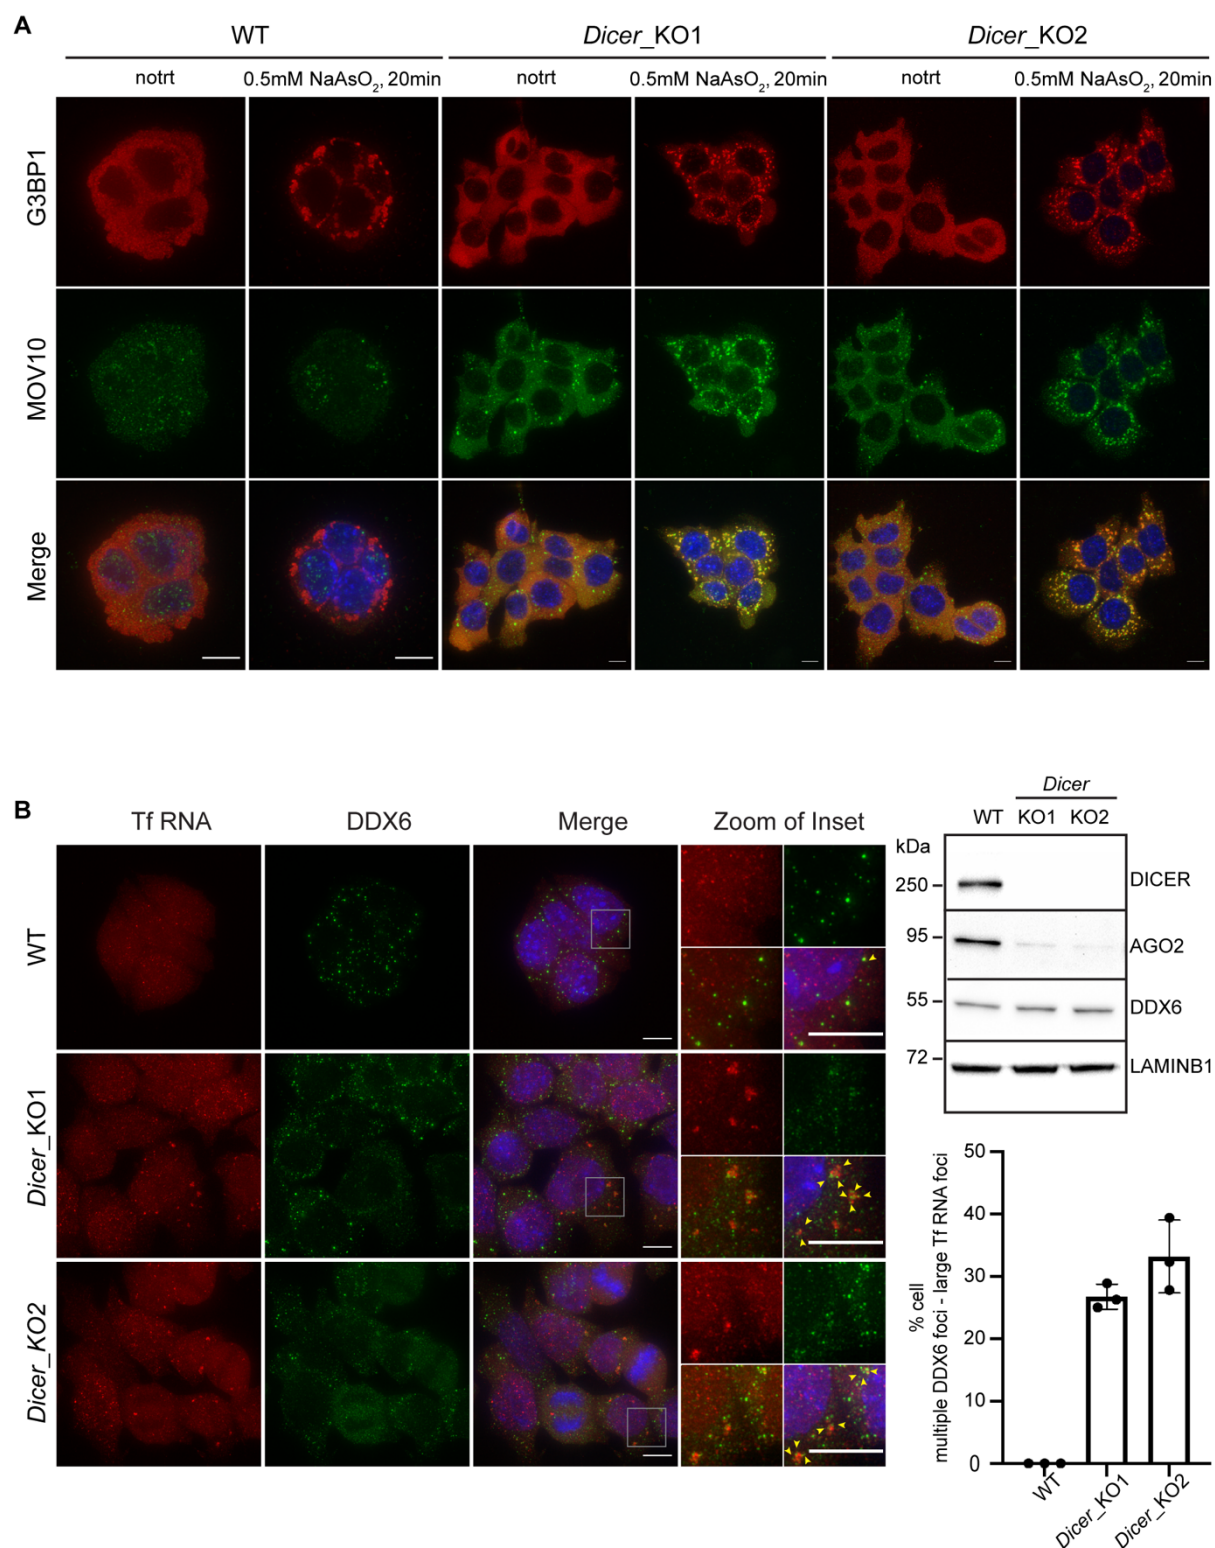

777  
 778 **Figure 2. Cytosolic L1 RNP foci are poised to be stress granules that co-localize with multiple**  
 779 **small DDX6 foci (A)** WT and *Dicer\_KO* mESCs were treated with 0.5mM Sodium Arsenite (NaAsO<sub>2</sub>)  
 780 for 20 minutes or left untreated prior to fixation with formaldehyde. Maximum intensity projections across  
 781 Z stacks of example images from indicated mESCs immunostained for G3BP1 (red) and MOV10  
 782 (green) with nuclei stained with DAPI (blue). Diffused cytoplasmic staining of G3BP1 was observed in

783 all untreated samples, while MOV10 was found to localize in cytoplasmic foci in *Dicer*\_KO cells.  
784 Treatment with Sodium Arsenite resulted in co-localization of G3BP1 and MOV10 in stress granules in  
785 *Dicer*\_KO cells. Images are representative of 3 independent experiments. **(B)** Representative Western  
786 Blots out of 3 independent experiments showing low AGO2 protein levels in *Dicer*\_KO as compared to  
787 WT mESCs (right side). No change in protein levels for DDX6 was observed, LAMINB1 served as  
788 loading control. Immunoblotting with Anti-DICER antibody was performed to confirm the fidelity of the  
789 KO clones. On the left side, maximum intensity projections across Z stacks of example images from  
790 indicated mESCs stained for L1 Tf RNA FISH (red) combined with immunostaining for a resident protein  
791 of P-bodies, DDX6 (green) and nuclei stained with DAPI (blue). The grey square marks position of the  
792 inset. Yellow arrow heads point to cytoplasmic foci where L1 RNA and DDX6 protein co-localize.  
793 Multiple small DDX6 foci were observed to co-localize with large L1 Tf RNA foci in the cytoplasm of  
794 *Dicer*\_KO but not in WT mESCs as depicted in the bar graph. Dots represent data from three  
795 independent experiments with percentage computed from at least 94-150 cells per cell line per  
796 experiment, error bars are standard deviations. Scale bar 5  $\mu$ m.  
797

798 **Figure 3**

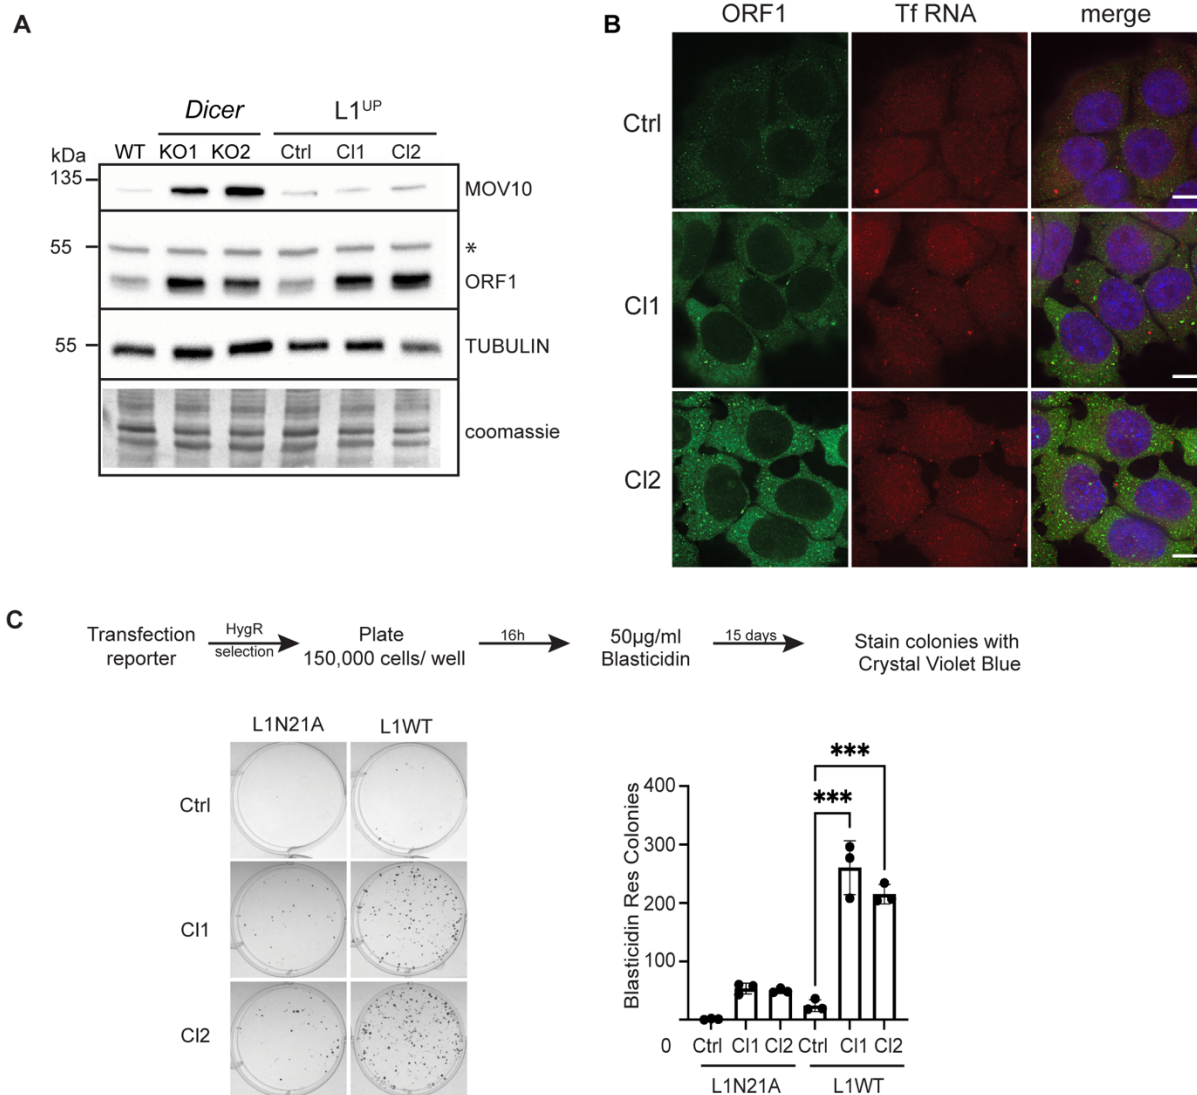

799

800 **Figure 3. Endogenous L1 upregulation leads to L1 retrotransposition (A)** Representative Western  
 801 Blots out of 3 independent experiments showing L1 ORF1 and MOV10 protein levels in the indicated  
 802 cell lines. Immunoblot with antibody recognizing TUBULIN and coomassie stained membranes depict  
 803 the loading, asterisk marks position of non-specific band in the ORF1 immunoblot. While higher L1  
 804 ORF1 levels are observed in *Dicer*<sub>KO</sub> and *L1<sup>UP</sup>* cells compared to WT and Ctrl cells respectively,  
 805 MOV10 overexpression is only observed in *Dicer*<sub>KO</sub> cells. **(B)** Maximum intensity projections across  
 806 Z stacks of example images from indicated mESCs immunostained for L1 ORF1 protein (green)  
 807 combined with RNA FISH for L1 Tf RNA (red) and nuclei stained with DAPI (blue). No aggregation of  
 808 L1 RNP in the cytoplasm is observed in *L1<sup>UP</sup>* cells. Scale bar 5  $\mu$ m. **(C)** Representative images of BlastR  
 809 colonies stained with crystal violet blue of indicated cell lines is shown on the left. Cells were transfected  
 810 with either mutant reporter plasmid (*L1N21A*) or retrotransposition competent reporter (*L1WT*) as  
 811 shown in the scheme with timeline for the experiment on the top. Bar graphs on the right depict the  
 812 average number of BlastR colonies, dots are mean values obtained from 3 independent experiments,  
 813 error bars are standard deviations. P-value was determined using unpaired student t-test and \*\*\*  
 814 represent p-value < 0.001.

815 **Figure 4**

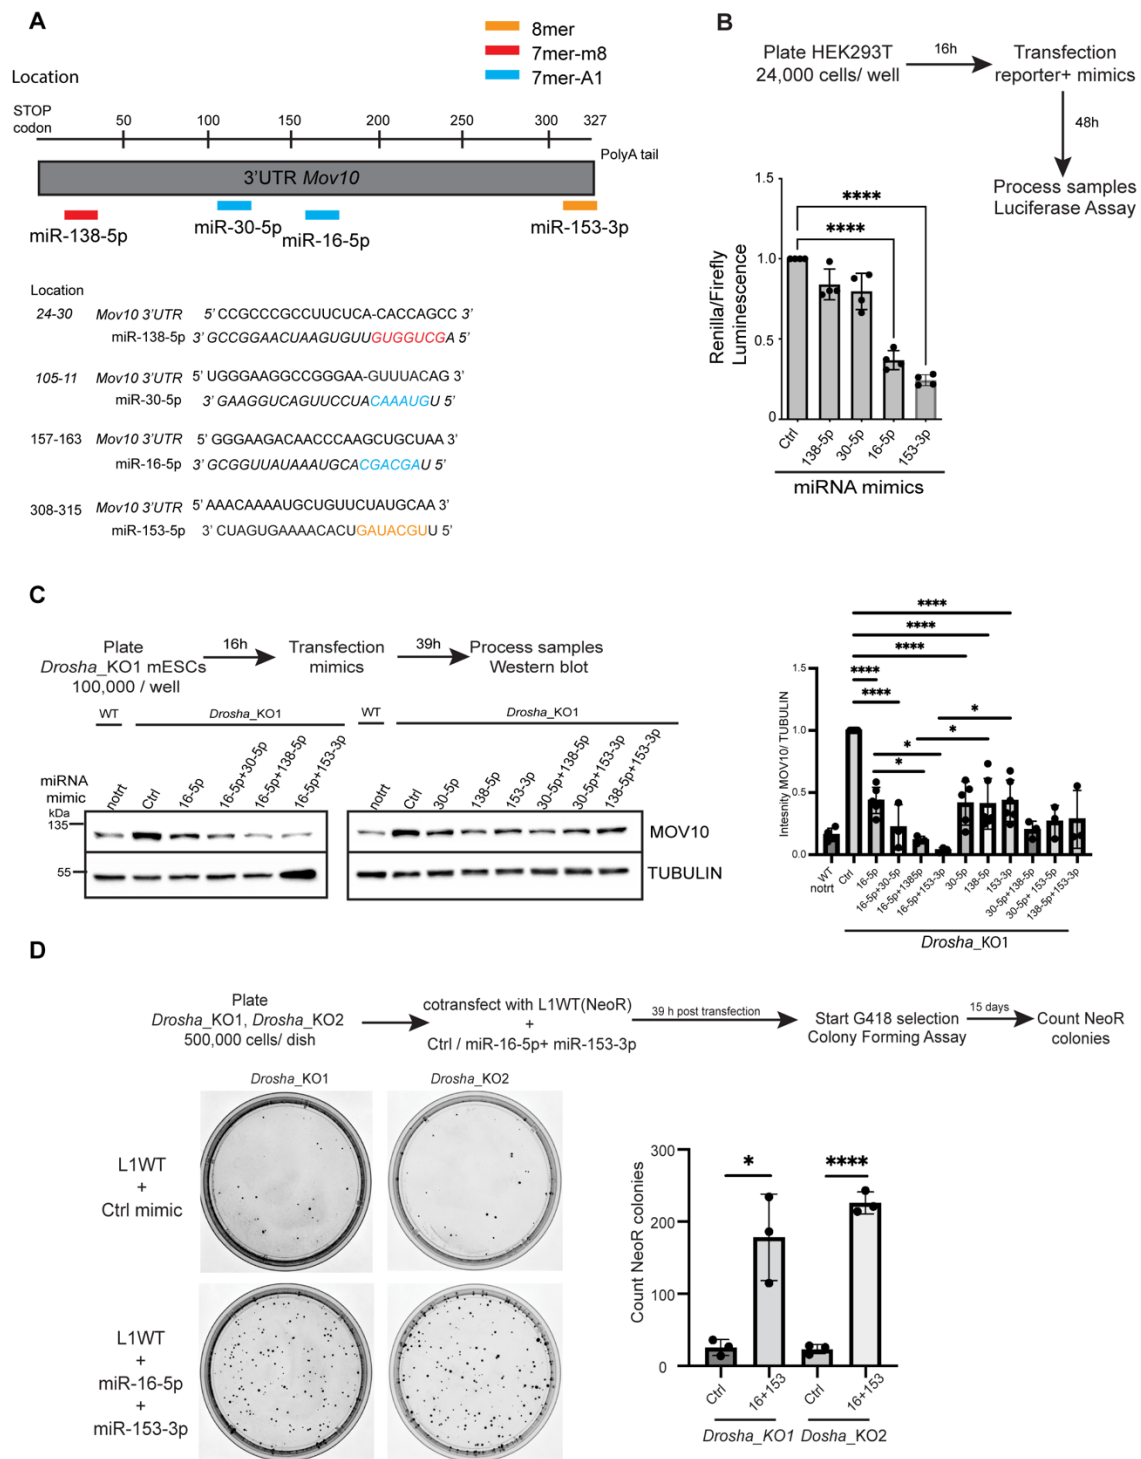

816

817 **Figure 4. Multiple miRNAs regulate MOV10 expression and L1 retrotransposition in mESCs (A)**

818 Schematic of 3'UTR sequence of *Mov10* RNA helicase. Location of miRNA response elements (MREs)

819 for mouse miR-138-5p (red), miR-30-5p (blue) miR-16-5p (blue) and miR-153-3p (orange) predicted to

820 target *Mov10* (ENSMUST00000168015.8) are color coded based on seed type matching for respective

821 miRNAs. (B) Schematic showing design and timeline of luciferase assay performed in human Hek293T

822 cells to assay direct miRNA mediated repression of *Mov10*. Bar graphs show the average relative

823 luminescence of reporter gene *Renilla* to which the 3'UTR sequence of *Mov10* was fused, normalized

824 by Firefly luminescence, where relative ratio observed for transfection with control (Ctrl) mimic was set  
825 to 1. Each dot on the bar graph is the mean from 4 independent experiments, errors are standard  
826 deviation. P-values were calculated using an unpaired t-test and \*\*\*\* are p-values < 0.0001. Renilla  
827 expression was sensitive to transfection with miR-16-5p and miR-153-3p. **(C)** Schematic showing  
828 design and timeline for processing samples for WB analysis in *Drosha\_KO1* cells. *Drosha\_KO1* were  
829 transfected either with Ctrl mimic or with indicated miRNA mimics either singly or in pairs. For  
830 comparison protein from untreated (notrt) WT cells was also run on the same blot. Blots were probed  
831 with anti-MOV10 and anti-TUBULIN antibodies. Bar graphs show mean intensity of MOV10 normalized  
832 by TUBULIN from 3 independent experiments relative to transfection for the Ctrl mimic that was set to  
833 1. P-values were computed using ordinary one-way ANOVA test comparing the mean of each sample  
834 to the mean of Ctrl, and the mean of doubly transfected mimic with its singly transfected counterpart. \*  
835 depict p-value < 0.05, and \*\*\*\* depict p-value < 0.0001. MOV10 expression was found to be sensitive  
836 to transfection with all four transfected mimics. MiR-16-5p was found to down-regulate expression of  
837 MOV10 synergistically with both miR-138-5p and miR-153-3p, to levels similar to those observed in WT  
838 mESCs. **(D)** Schematic summarizing the experiment and timeline followed for colony forming assay in  
839 *Drosha\_KO* mESCs transfected with either Ctrl mimic or miRNA mimics for miR-16-5p + miR-153-3p  
840 along with L1WT plasmid bearing NeoR gene as reporter. Representative images of NeoR colonies  
841 stained with crystal violet blue of indicated cell lines are shown on the left. Bar graphs on the right depict  
842 the average number of NeoR colonies, dots are mean values obtained from 3 independent experiments,  
843 error bars are standard deviations. P-value was determined using unpaired student t-test and \*  
844 represent p-value < 0.05, \*\*\*\* represent p-value < 0.0001. Downregulation of *Mov10* expression due to  
845 transfection with indicated miRNA mimics in *Drosha\_KO* cells resulted in an increase in the rate of  
846 mobility of L1 elements.

847

848

849

850

851

852

853

854

855

856

857

858

859

860

861 **Figure 5**

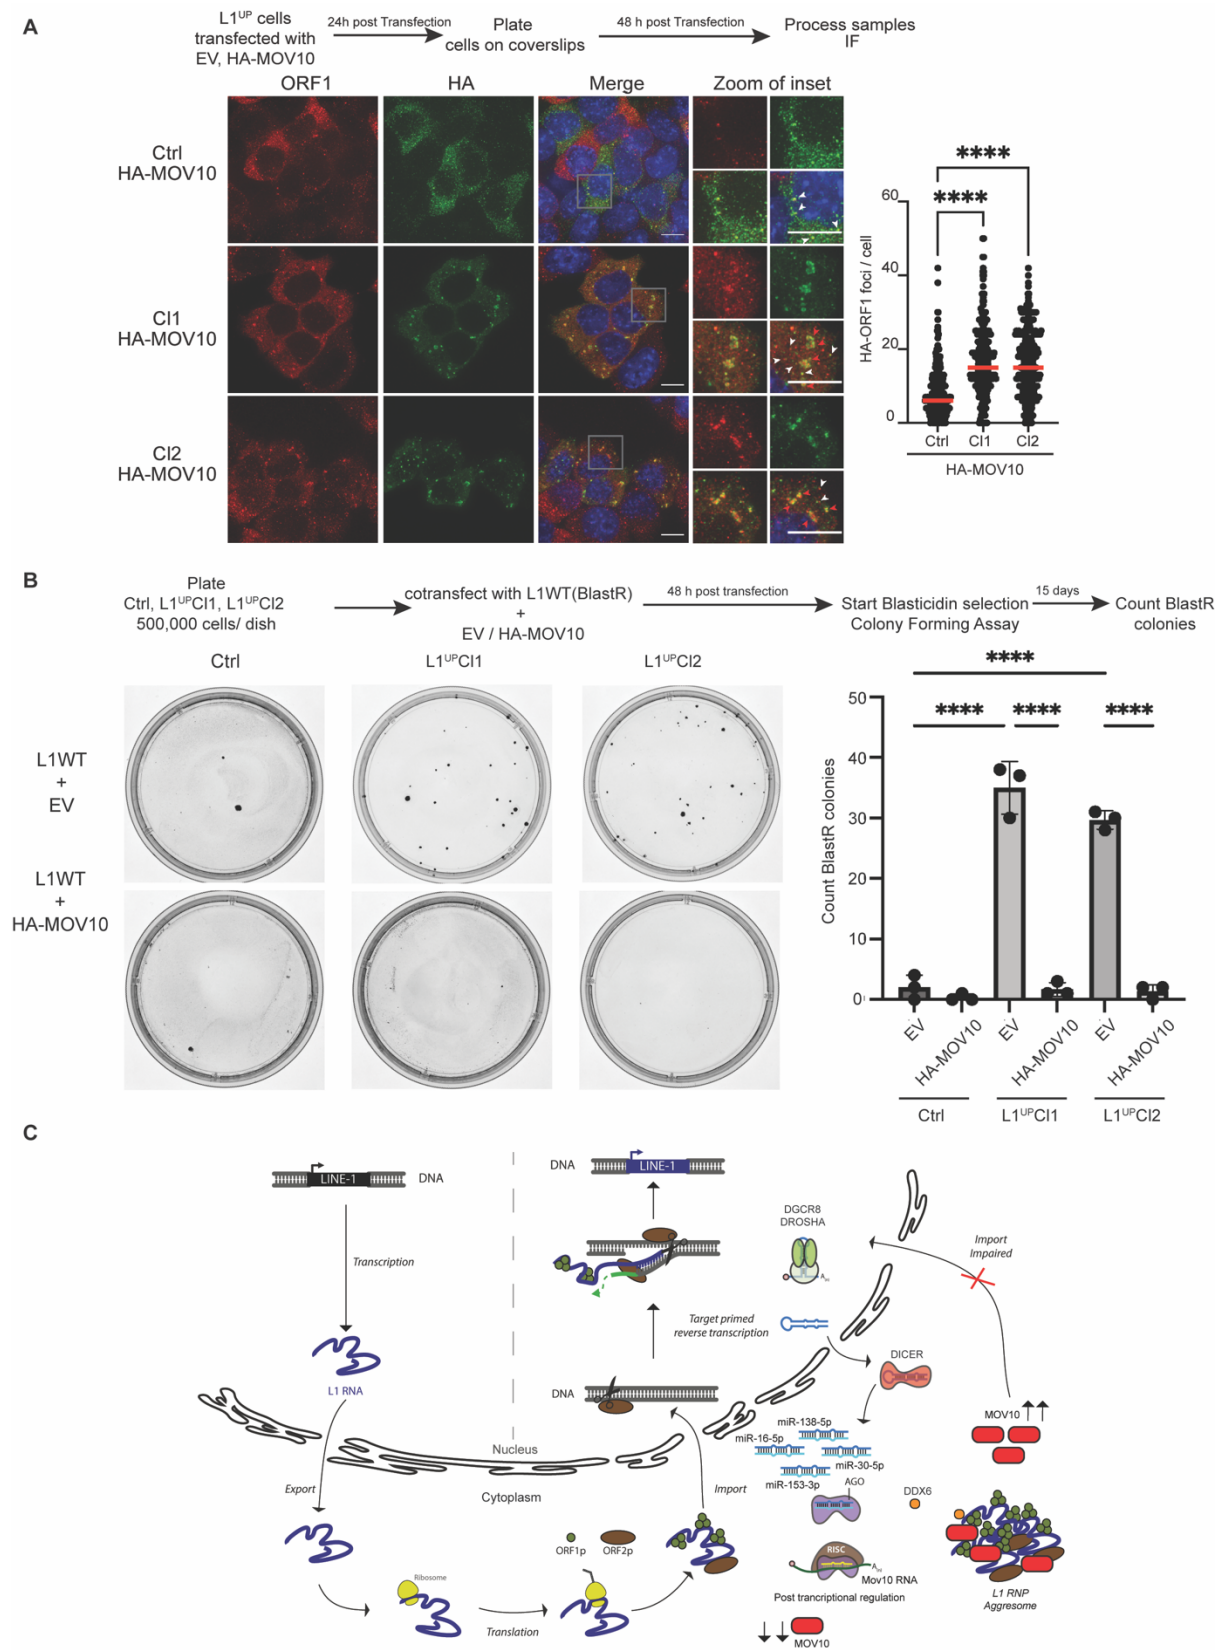

862

863 **Figure 5. MOV10 upregulation is sufficient to create L1 RNP aggregates in L1<sup>UP</sup> mESCs**

864 **abrogating L1 retrotransposition. (A)** Scheme for transfection and timeline for processing samples

865 for IF. Maximum intensity projections across Z stacks of example images from indicated mESCs stained

866 for L1 ORF1 (red) combined with immunostaining for HA (green) to detect ectopically expressed MOV10  
867 tagged with HA at the N-terminus, and nuclei stained with DAPI (blue). White arrow heads point to  
868 cytoplasmic foci where L1 ORF1 and HA-MOV10 protein co-localize. Red arrow heads point to relatively  
869 larger sized HA-ORF1 foci. Data collected from 289 Ctrl, 275 L1<sup>UP</sup> CI1 and 296 L1<sup>UP</sup> CI2 mESCs from  
870 three independent experiments are depicted as scatter plots where circles are single data points  
871 representing number of co-localized HA-ORF1 foci in the cytoplasm per cell. Red bar marks median for  
872 the distribution. P-value was determined using Mann-Whitney *U* test and \*\*\*\* represent p-value <  
873 0.0001. Statistically significant increase in cytoplasmic L1 ORF1 aggregates was observed upon  
874 ectopic expression of HA-MOV10 in L1<sup>UP</sup> as compared to Ctrl mESCs. **(B)** Schematic summarizing the  
875 experiment and timeline followed for colony forming assay in Ctrl and L1<sup>UP</sup> mESCs transfected with  
876 either Empty Vector (EV) or HA-MOV10 plasmid along with L1WT plasmid bearing BlastR as reporter.  
877 Representative images of BlastR colonies stained with crystal violet blue of indicated cell lines are  
878 shown on the left. Bar graphs on the right depict the average number of BlastR colonies, dots are mean  
879 values obtained from 3 independent experiments, error bars are standard deviations. P-value was  
880 determined using unpaired student t-test and, \*\*\*\* represent p-value < 0.0001. Upregulation of MOV10  
881 in L1<sup>UP</sup> mESCs restricted L1 retrotransposition. **(C)** The life cycle of L1 retrotransposition is depicted.  
882 Only full length L1 elements get transcribed driven by the promoter residing in its 5'UTR sequence. The  
883 bicistronic L1 RNA is exported from the nucleus into the cytosol and translated to give rise to L1 ORF1  
884 (ORF1p) and L1 ORF2 (ORF2p) proteins. The L1 RNA and proteins form a complex (L1 RNP) and are  
885 imported back into the nucleus. Endonuclease activity of ORF2 nicks the target DNA and using a  
886 mechanism referred to as Target primed reverse transcription a new copy of L1 element is inserted into  
887 the genome via a copy past mechanism of mobilization<sup>3,12</sup>. A key regulatory step for retrotransposition  
888 is the import of L1RNP back into the nucleus. The canonical miRNA biogenesis pathway illustrates the  
889 miRNAs discovered in this study that regulate expression of RNA helicase *Mov10* a known modulator  
890 of L1 mobility. In the absence of miRNAs when either DICER or DROSHA proteins are deleted in  
891 mESCs, both L1 and MOV10 expression are upregulated. Our data suggests that in microRNA mutant  
892 mESCs MOV10 induces L1 RNP aggregate formation in the cytoplasm, the impaired import  
893 consequently prevents L1 retrotransposition despite high L1 expression. While DDX6 was also found  
894 to co-localize with the larger L1 RNP particles, identification of molecular partners and biochemical  
895 activities intrinsic to the L1 RNP aggregates should unveil the bottle neck afforded to prevent import.  
896  
897  
898  
899  
900  
901  
902  
903  
904  
905

906 **Extended Data Fig. 1**

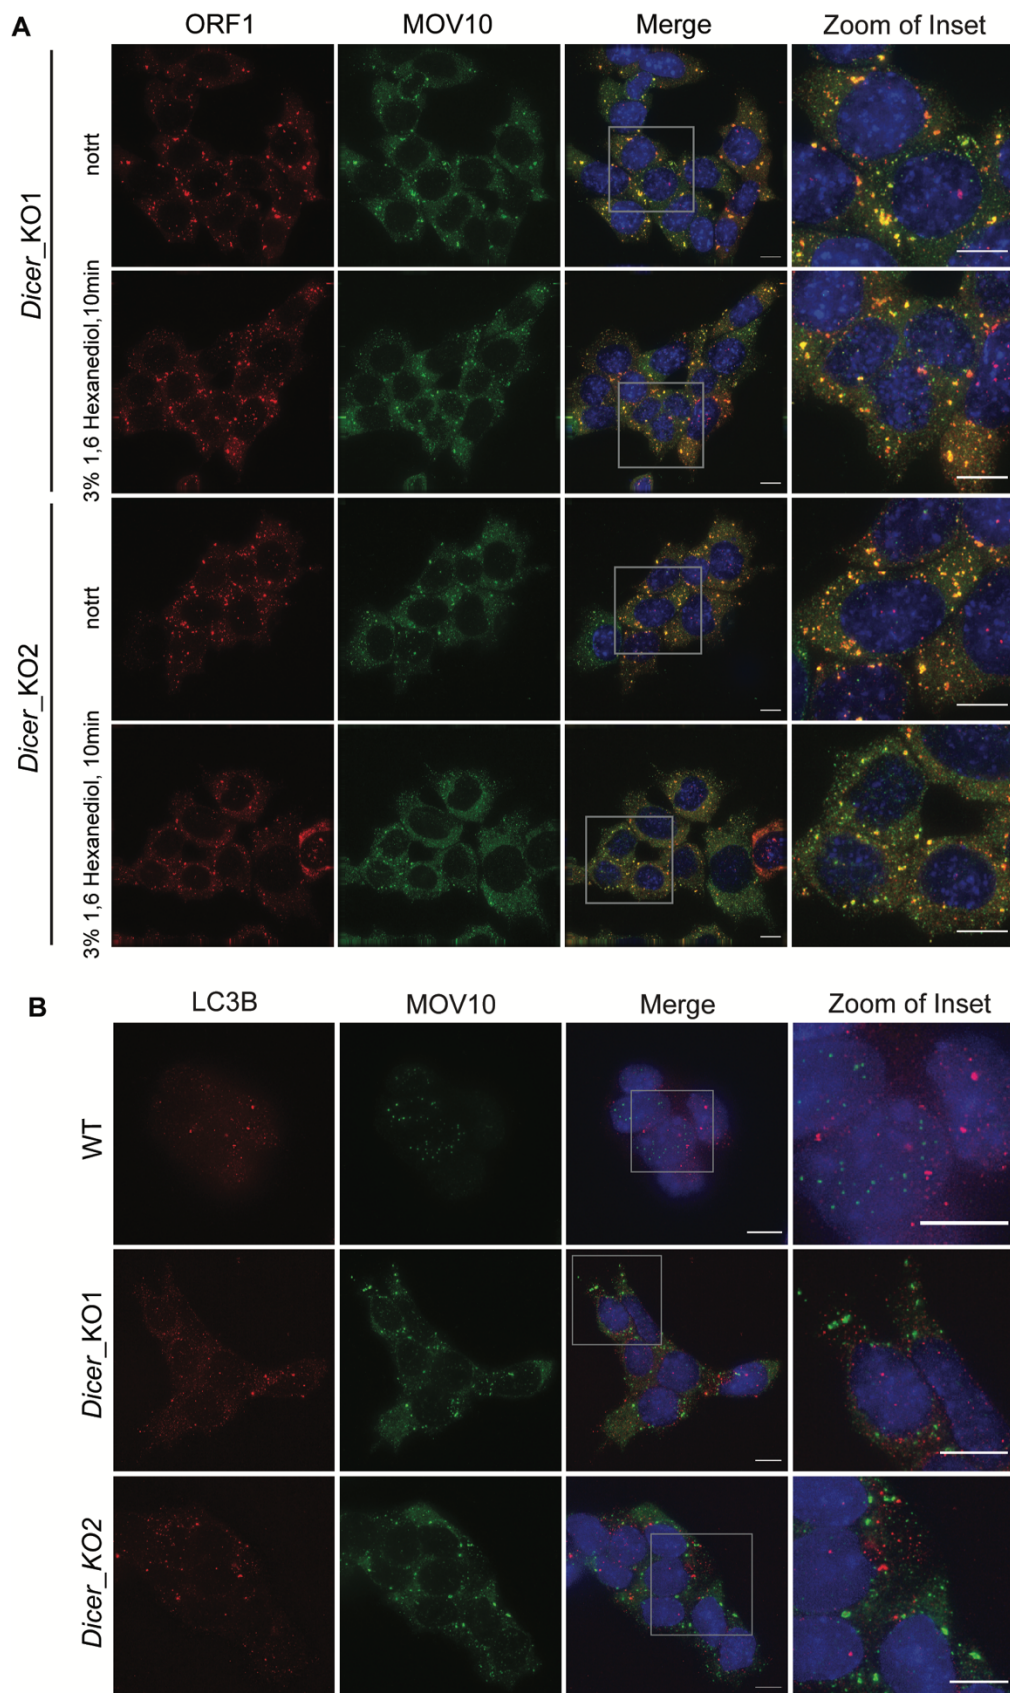

907

908 **Extended Data Fig. 1. L1 RNP cytosolic aggregates are not sensitive to treatment with 3% 1,6**

909 **Hexanediol (A)** WT and *Dicer\_KO* mESCs were treated the 3% 1,6 Hexanediol for 10 minutes to



910 assess ability of L1 RNP to phase separate. Maximum intensity projections across Z stacks of example  
911 images from indicated mESCs immunostained for L1 ORF1 (red) and MOV10 (green) with nuclei  
912 stained with DAPI (blue). The lack of any discernible change in L1 ORF1-MOV10 foci formation  
913 indicates absence of LLPS for L1 ORF1-MOV10 foci. Images are representative of 3 independent  
914 experiments. Grey box mark position of the insets. **(B)** Maximum intensity projections across Z stacks  
915 of example images from indicated mESCs immunostained for LC3B (red) and MOV10 (green) with  
916 nuclei stained with DAPI (blue). The absence of any co-localization of LC3B with MOV10 in the tested  
917 cell lines indicate that the L1 RNP foci are not autophagosomes. The grey square depicts position of  
918 inset. Images are representative of 3 independent experiments. Scale bar 5  $\mu$ m.

919

920

921

922

923

924

925

926

927

928

929

930

931

932

933

934

935

936

937

938

939

940

941

942

943

944

945 **Extended Data Fig. 2**

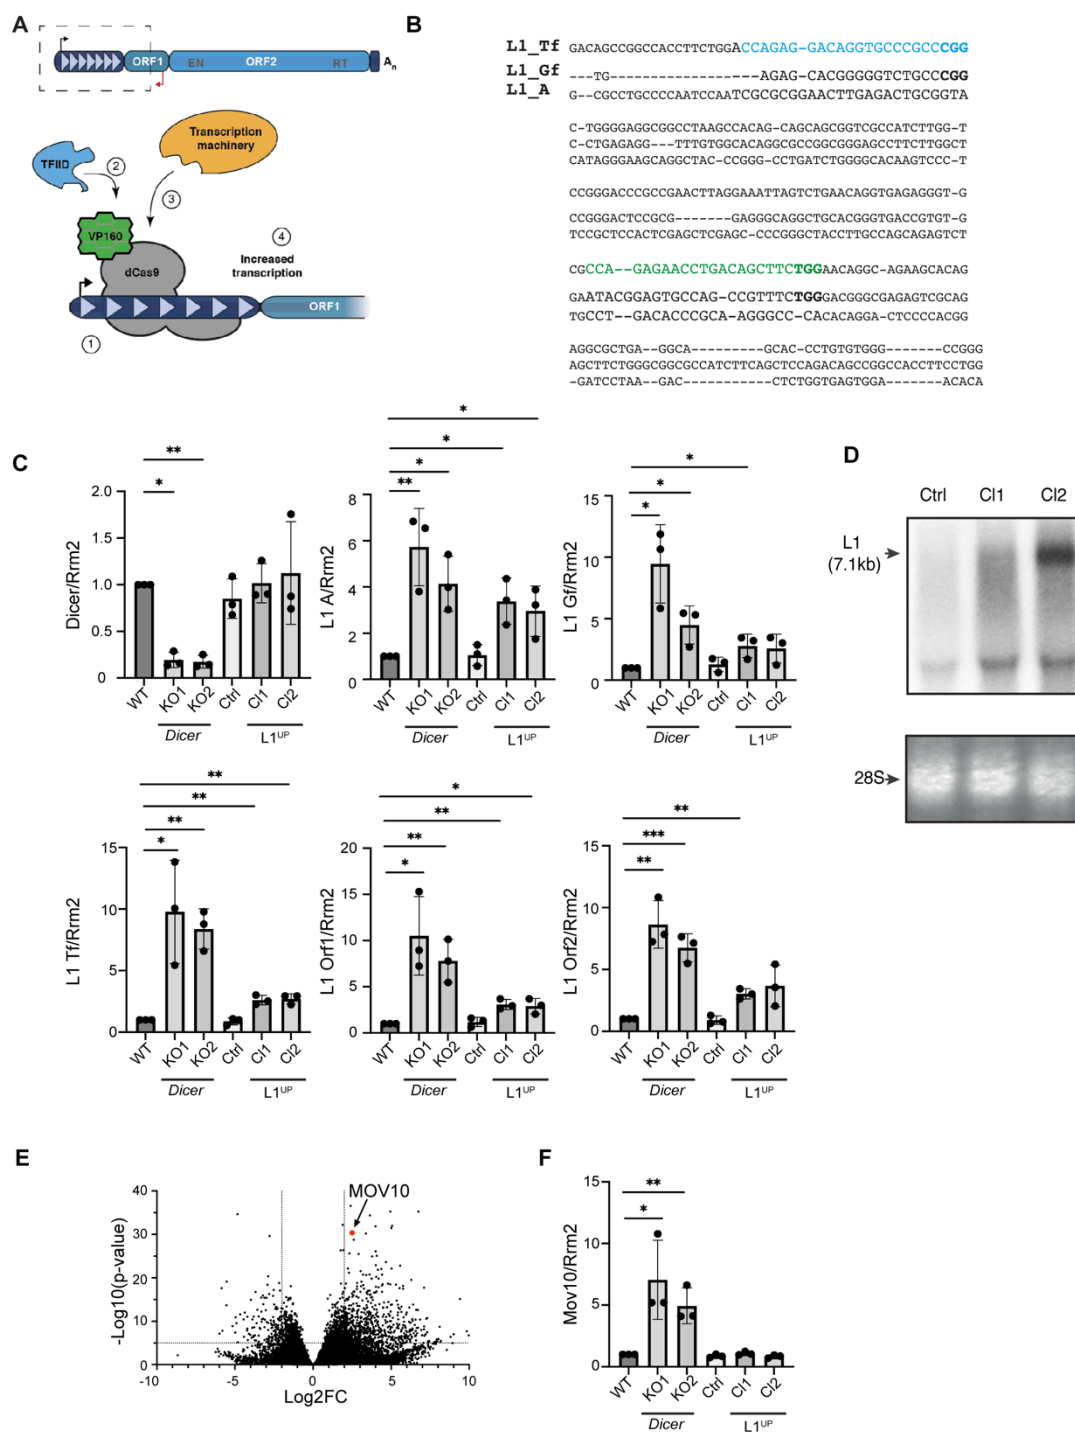

946  
 947 **Extended Data Fig. 2. Generation of mESCs upregulating L1 expression using CRISPRa (A)**  
 948 Schematic depicting full length L1 element and summary of CRISPRa. To generate L1<sup>UP</sup> cells, mESCs  
 949 were co-transfected with plasmid encoding catalytically dead Cas9 protein (dCas9) fused to VP160 and  
 950 sgRNAs that (1) targeted the fusion protein to the 5'UTR sequence of Tf L1 family allowing (2)  
 951 recruitment of transcription factors and (3) transcription machinery to (4) upregulate L1 transcription.

952 **(B)** Sequence alignment of 5'UTR sequences of murine L1 Tf, Gf and A subfamilies. The two sgRNA  
953 sequences used to upregulate L1 expression are indicated in blue and green, with protospacer adjacent  
954 motifs (PAM) in bold. **(C)** RT qPCR analysis to quantitate *Dicer*, and L1 RNA expression levels in the  
955 depicted cell lines. *Rrm2* was utilized for normalization, and graphs depict fold change in transcript  
956 levels in the indicated cell lines as compared to WT which was set to one. Bar graphs show means from  
957 3 independent experiments, error bars are standard deviations, p-values were computed using unpaired  
958 t-test comparing results from individual cells to WT mESCs. Asterisk are p-values \* < 0.05, \*\* < 0.001,  
959 \*\*\* < 0.0005. **(D)** Northern blot analysis probed for L1 RNA to assess L1 transcript length and expression  
960 levels in the engineered L1<sup>UP</sup> CI1, CI2 as compared to Ctrl cells. Arrow points to full length L1 transcript.  
961 Ethidium bromide staining of 28S RNA was used to confirm equal loading. **(E)** Differential gene  
962 expression from RNA-seq analysis of *Dicer*\_KO vs. WT mESCs plotted using previously published data  
963 <sup>13</sup>. Each dot represents a single gene. Position for *Mov10* in the graph is marked. Values for Log2 fold  
964 change (Log2FC) were plotted on the x-axis and Log10 of the p-value on the y-axis. **(F)** RT qPCR  
965 analysis to confirm upregulation of *Mov10* in *Dicer*\_KO cells. No change in *Mov10* transcript levels were  
966 observed in Ctrl, L1<sup>UP</sup> CI1, CI2 as compared to WT mESCs. *Rrm2* was utilized for normalization, and  
967 graphs depict fold change in transcript levels in the indicated cell lines as compared to WT which was  
968 set to one. Bar graphs show means from 3 independent experiments, error bars are standard  
969 deviations, p-values were computed using unpaired t-test comparing results from individual cells to WT  
970 mESCs. Asterisk are p-values \* < 0.05, \*\* < 0.001.

971

972

973

974

975

976

977

978

979

980

981

982

983

984

985

986

987

988

989 **Extended Data Fig. 3**

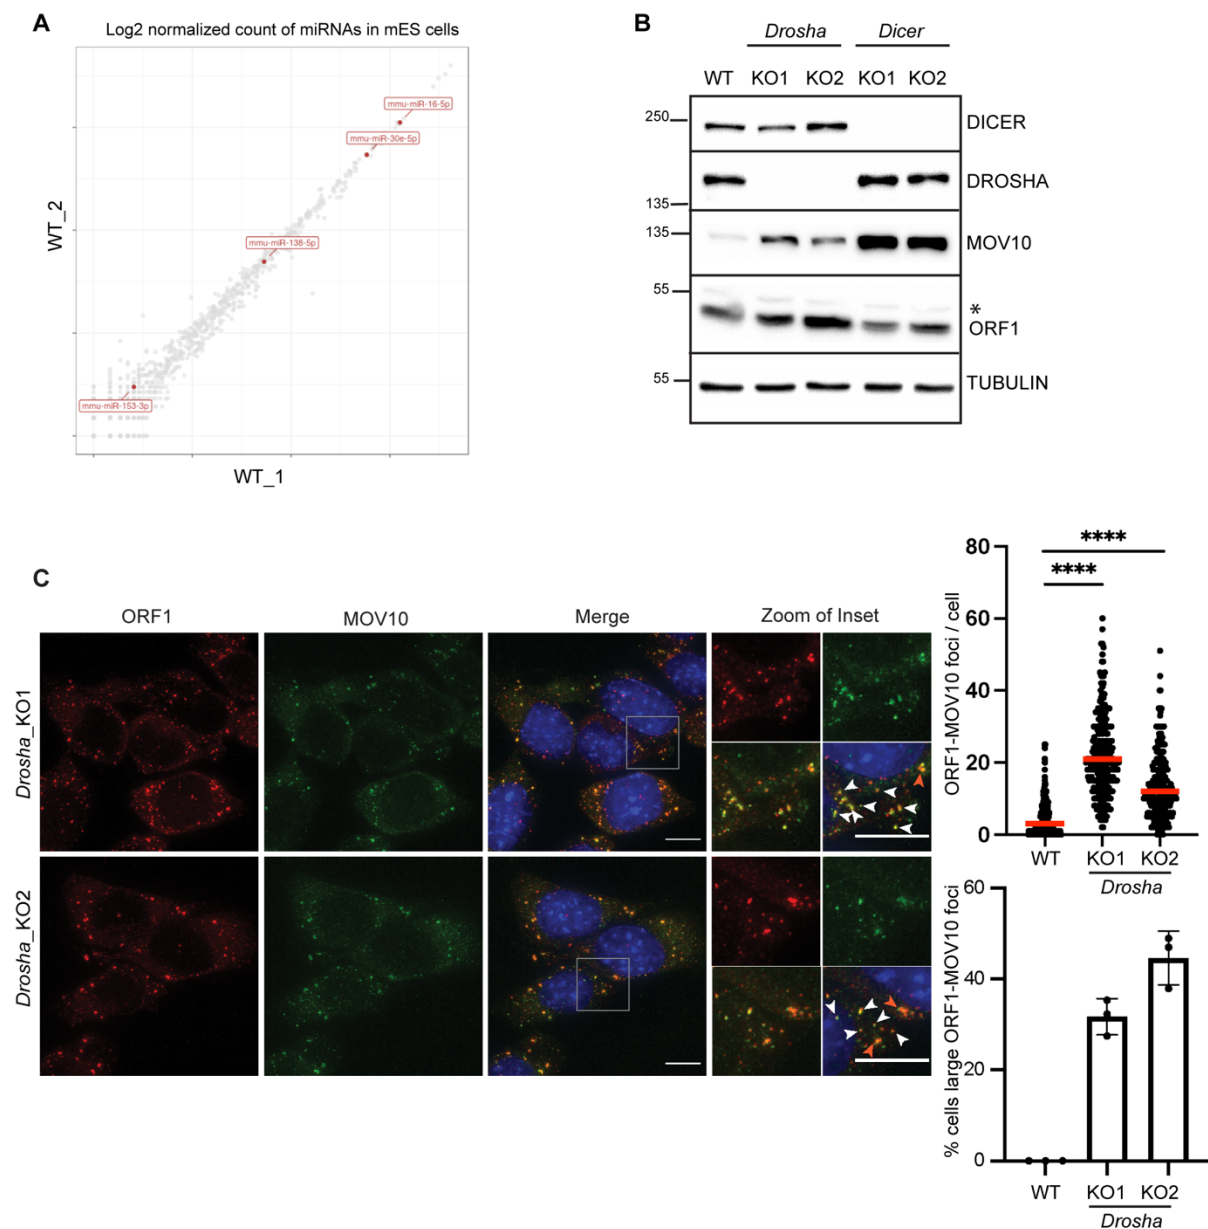

990  
 991 **Extended Data Fig. 3. Upregulation of L1 ORF1 and MOV10 in the absence of miRNAs in**  
 992 ***Drosha*\_KO mESCs induces L1 RNP aggregation in the cytoplasm (A)** Log2 normalized count of  
 993 miRNAs in WT mESCs from previously published small RNA-seq data <sup>44</sup>. Each dot depicts a single  
 994 miRNA and miRNAs predicted using TargetScan <sup>43</sup> to regulate *Mov10* expression are shown in red.  
 995 **(B)**Western Blot analysis to assess expression of L1 ORF1 and MOV10 in the indicated cell lines,  
 996 immunoblot with TUBULIN served to control for loading. Membranes were probed with anti-DICER and  
 997 anti-DROSHA antibodies to confirm the deletion status of the cells. Upregulation of L1 ORF1 and of  
 998 MOV10 was observed in *Drosha*\_KO relative to WT mESCs. Asterisk marks non-specific band  
 999 recognized by ORF1 antibody **(C)** Maximum intensity projections across Z stacks of example images  
 1000 from *Drosha*\_KO mESCs immunostained for L1 ORF1 (red), MOV10 (green) and nuclei stained with  
 1001 DAPI (blue). White arrow heads point to cytoplasmic foci where L1 ORF1 and MOV10 co-localize. Red  
 1002 arrow heads point to relatively larger sized L1 RNP foci. Data collected from 288 *Drosha*\_KO1, 299

1003 *Drossha*\_KO2 cells from three independent experiments are depicted as scatter plots where circles are  
1004 single data points representing number of co-localized L1 ORF1-MOV10 foci in the cytoplasm per cell,  
1005 red bar is median for the distribution. Data for WT cells for comparison is the same as in Figure 1B. P-  
1006 value was determined using Mann-Whitney *U* test and \*\*\*\* represent p-value < 0.0001. Bar graphs are  
1007 mean values of percentage of cells with large L1 ORF1-MOV10 foci co-localizing in the cytoplasm. Dots  
1008 represent data from three independent experiments, error bars are standard deviations. Scale bar 5  
1009  $\mu\text{m}$ .  
1010
